# Supplementary material for: Targeting of the Mitochondrial TET1 Protein by Pyrrolo[3,2-b]pyrrole Chelators
Source: MDPI journal article supplement (doi:10.3390/ijms231810850), 2022-09-16
Supplement: s1 [file s1]

# Targeting of the Mitochondrial TET1 Protein by Pyrrolo[3,2-*b*]pyrrole Chelators

Veronika Antonyová <sup>1,2</sup>, Ameneh Tatar <sup>1,3</sup>, Tereza Brogyányi <sup>1,4</sup>, Zdeněk Kejík <sup>1,2,3</sup>, Robert Kaplánek <sup>1,2,3</sup>, Frédéric Vellieux <sup>2</sup>, Nikita Abramenko <sup>1,2</sup>, Alla Sinica <sup>2,3</sup>, Jan Hajduch <sup>2,3</sup>, Petr Novotný <sup>1,2</sup>, Bettie Sue Masters <sup>5</sup>, Pavel Martásek <sup>1,\*</sup> and Milan Jakubek <sup>1,2,3,\*</sup>

<sup>1</sup> Department of Paediatrics and Inherited Metabolic Disorders, First Faculty of Medicine, Charles University and General University Hospital in Prague, Ke Karlovu 455/2, 128 08 Prague, Czech Republic

<sup>2</sup> BIOCEV, First Faculty of Medicine, Charles University, 252 20 Vestec, Czech Republic

<sup>3</sup> Department of Analytical Chemistry, Faculty of Chemical Engineering, University of Chemistry and Technology, 166 28 Prague, Czech Republic

<sup>4</sup> Institute of Pathological Physiology, First Faculty of Medicine, Charles University, 128 53 Prague, Czech Republic

<sup>5</sup> Duke University Medical Center, Department of Biochemistry, Durham, NC 27707, USA

\* Correspondence: pavel.martasek@lf1.cuni.cz (P.M.); milan.jakubek@lf1.cuni.cz (M.J.)

## Supplementary Materials

### Contents

**Figure S1.** NMR spectra of Compound 1 in DMSO-*d*<sub>6</sub>.

**Figure S2.** NMR spectra of Compound 2 in DMSO-*d*<sub>6</sub>.

**Figure S3.** NMR spectra of Compound 3 in DMSO-*d*<sub>6</sub>.

**Figure S4.** NMR spectra of Compound 4 in DMSO-*d*<sub>6</sub>.

**Figure S5.** NMR spectra of Compound 5 in DMSO-*d*<sub>6</sub>.

**Figure S6.** NMR spectra of Compound 6 in DMSO-*d*<sub>6</sub>.

**Figure S7.** NMR spectra of Compound 7 in DMSO-*d*<sub>6</sub>.

**Figure S8.** HRMS spectra of Compound 1.

**Figure S9.** HRMS spectra of Compound 2.

**Figure S10.** HRMS spectra of Compound 3.

**Figure S11.** HRMS spectra of Compound 4.

**Figure S12.** HRMS spectra of Compound 5.

**Figure S13.** HRMS spectra of Compound 6.

**Figure S14.** HRMS spectra of Compound 7.

**Figure S15.** Close up view of the TET1 active site showing docked compound 2 in a sphere representation.

**Figure S16.** Close up view of the TET1 active site showing docked compound 3 in a sphere representation.

**Figure S17.** Close up view of the TET1 active site showing docked compound 4 in a sphere representation.

**Figure S18.** Close up view of the TET1 active site showing docked compound 5 in a sphere representation.

**Figure S19.** Close up view of the TET1 active site showing docked compound 6 in a sphere representation.

**Figure S20.** Close up view of the TET1 active site showing docked compound 7 in a sphere representation.

**Table S1.** Residual TET1 protein activity on the concentration of compound 1.

**Table S2.** Viability of Caov-3 cells in the presence of compound 1.

**Table S3.** Viability of Caov-3 cells in the presence of compound 2.

**Table S4.** Viability of Caov-3 cells in the presence of compound 3.

**Table S5.** Viability of Caov-3 cells in the presence of compound 4.  
**Table S6.** Viability of Caov-3 cells in the presence of compound 5.  
**Table S7.** Viability of Caov-3 cells in the presence of compound 6.  
**Table S8.** Viability of H-1299 cells in the presence of compound 1.  
**Table S9.** Viability of H-1299 cells in the presence of compound 2.  
**Table S10.** Viability of H-1299 cells in the presence of compound 3.  
**Table S11.** Viability of H-1299 cells in the presence of compound 4.  
**Table S12.** Viability of H-1299 cells in the presence of compound 5.  
**Table S13.** Viability of H-1299 cells in the presence of compound 6.  
**Table S14.** Viability of BT-20 cells in the presence of compound 1.  
**Table S15.** Viability of BT-20 cells in the presence of compound 2.  
**Table S16.** Viability of BT-20 cells in the presence of compound 3.  
**Table S17.** Viability of BT-20 cells in the presence of compound 4.  
**Table S18.** Viability of BT-20 cells in the presence of compound 5.  
**Table S19.** Viability of BT-20 cells in the presence of compound 6.  
**Table S20.** Viability of U-118 MG cells in the presence of compound 1.  
**Table S21.** Viability of U-118 MG cells in the presence of compound 2.  
**Table S22.** Viability of U-118 MG cells in the presence of compound 3.  
**Table S23.** Viability of U-118 MG cells in the presence of compound 4.  
**Table S24.** Viability of U-118 MG cells in the presence of compound 5.  
**Table S25.** Viability of U-118 MG cells in the presence of compound 6.  
**Table S26.** Viability of HF-P4 cells in the presence of compound 1.  
**Table S27.** Viability of HF-P4 cells in the presence of compound 2.  
**Table S28.** Viability of HF-P4 cells in the presence of compound 3.  
**Table S29.** Viability of HF-P4 cells in the presence of compound 4.  
**Table S30.** Viability of HF-P4 cells in the presence of compound 5.  
**Table S31.** Viability of HF-P4 cells in the presence of compound 6.

# NMR spectra of Compound 1-7 in DMSO-d<sub>6</sub>

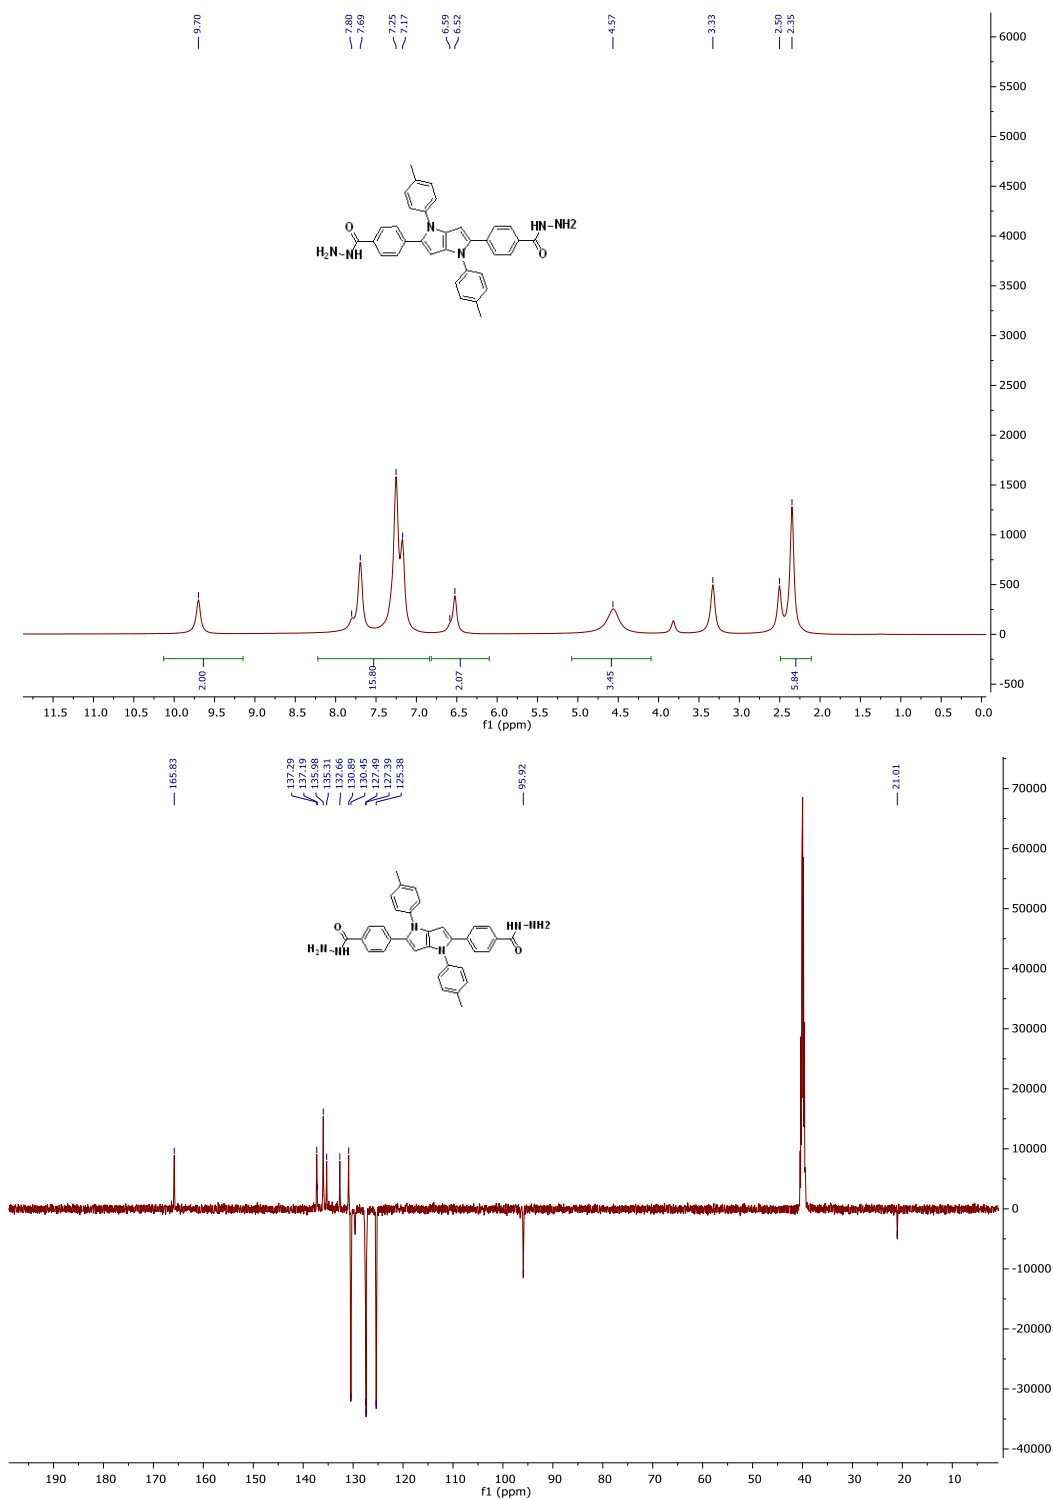

**Figure S1.** <sup>1</sup>H NMR and <sup>13</sup>C NMR spectra of Compound 1 in DMSO-d<sub>6</sub>.

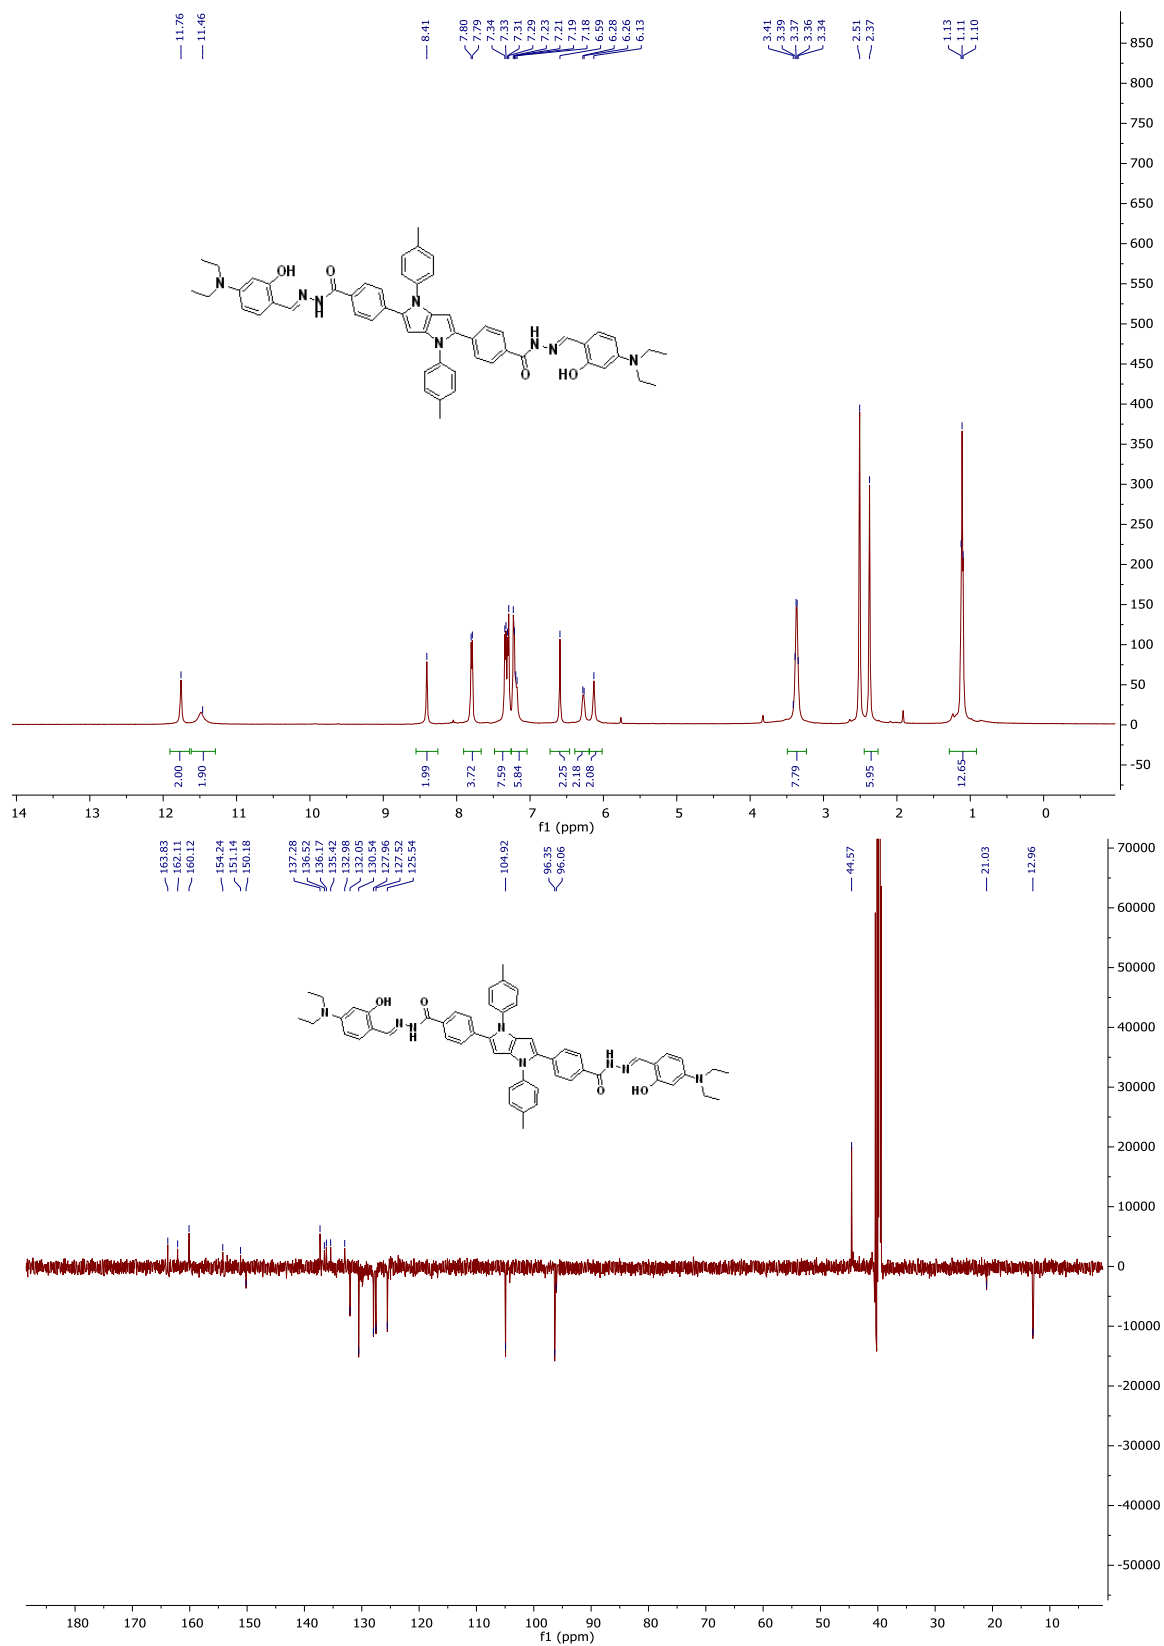

**Figure S2.** <sup>1</sup>H NMR and <sup>13</sup>C NMR spectra of Compound 2 in DMSO-d<sub>6</sub>.

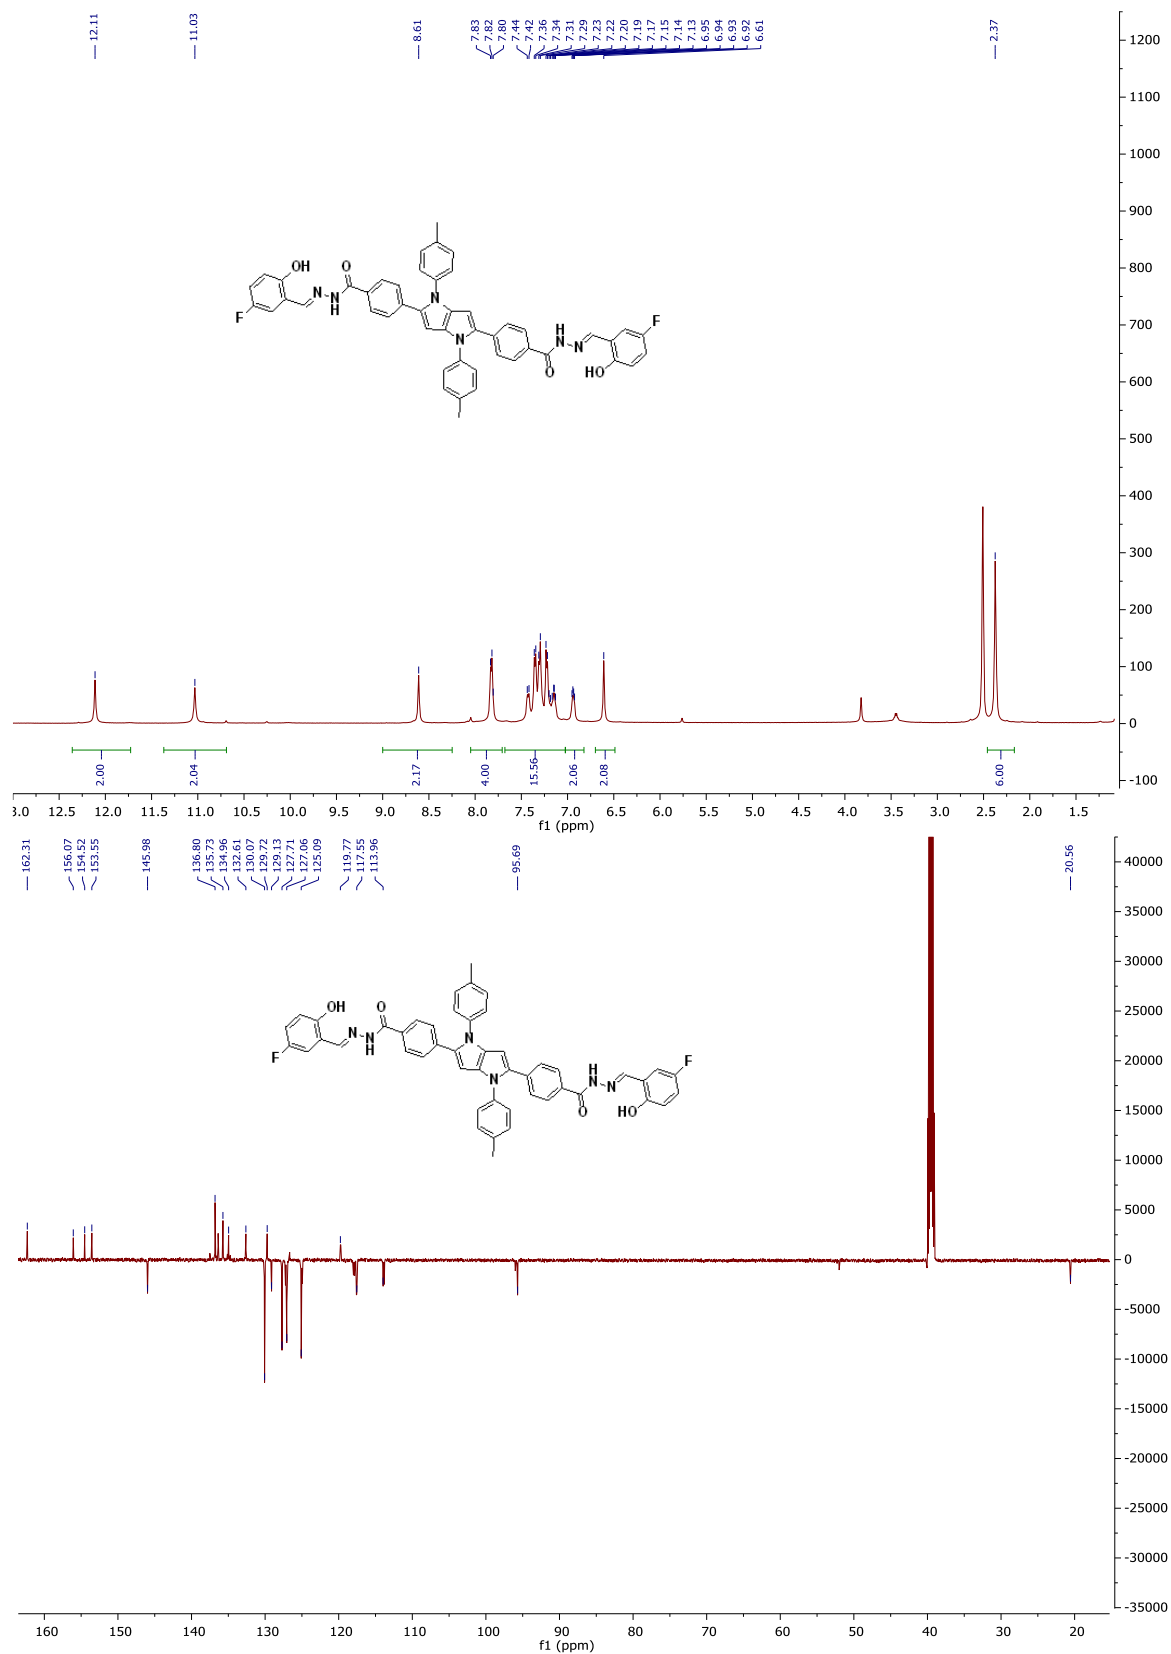

**Figure S3.** <sup>1</sup>H NMR and <sup>13</sup>C NMR spectra of Compound 3 in DMSO-d<sub>6</sub>.

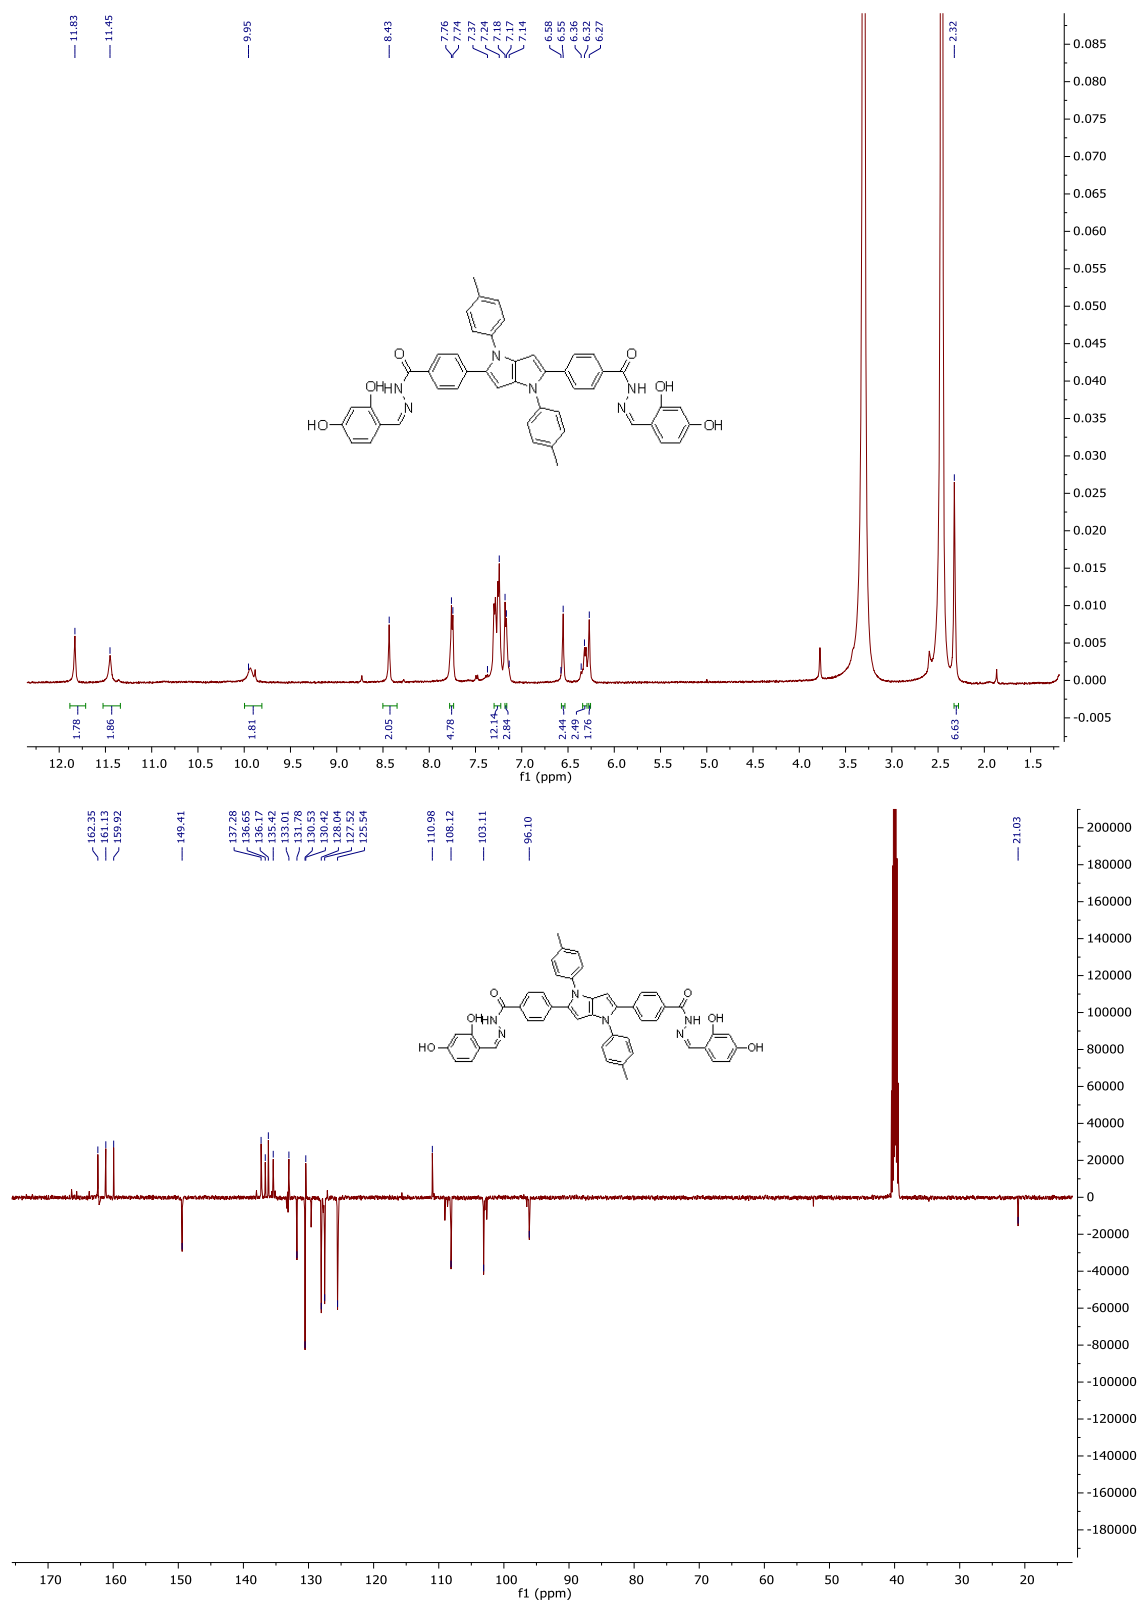

**Figure S4.** <sup>1</sup>H NMR and <sup>13</sup>C NMR spectra of Compound **4** in DMSO-d<sub>6</sub>.

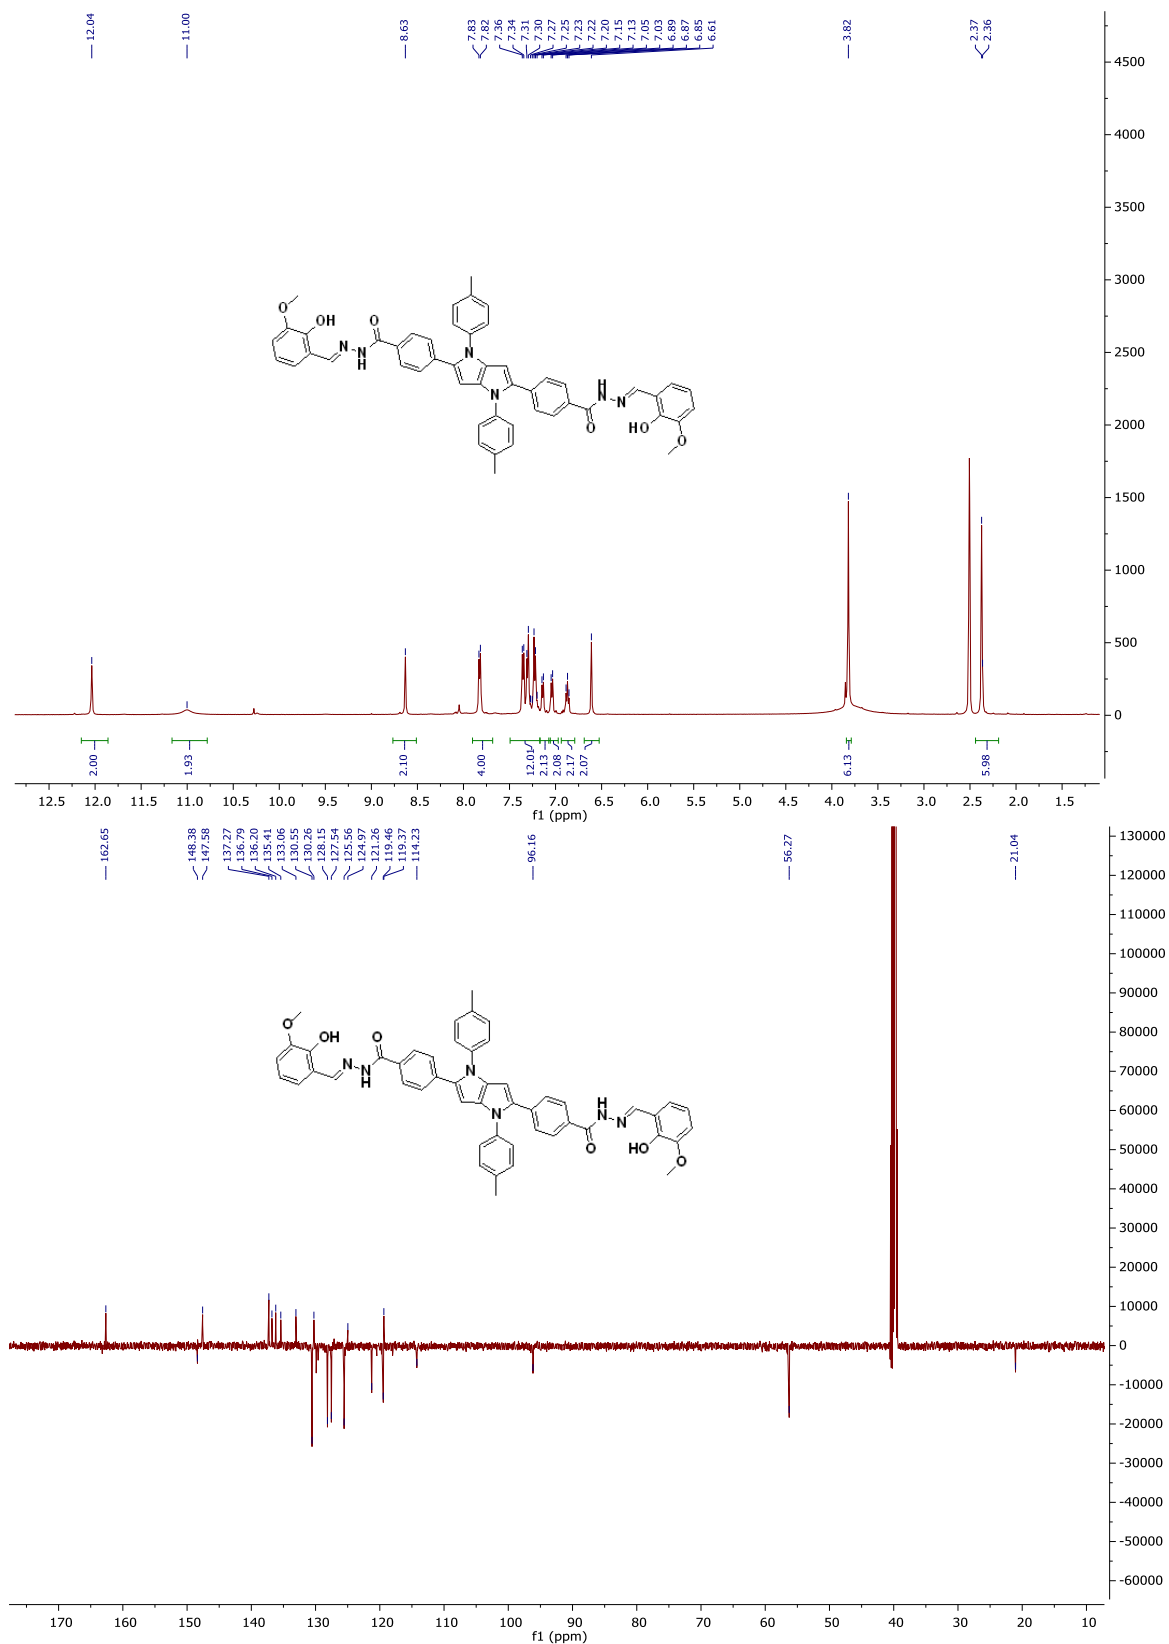

**Figure S5.** <sup>1</sup>H NMR and <sup>13</sup>C NMR spectra of Compound 5 in DMSO-d<sub>6</sub>.

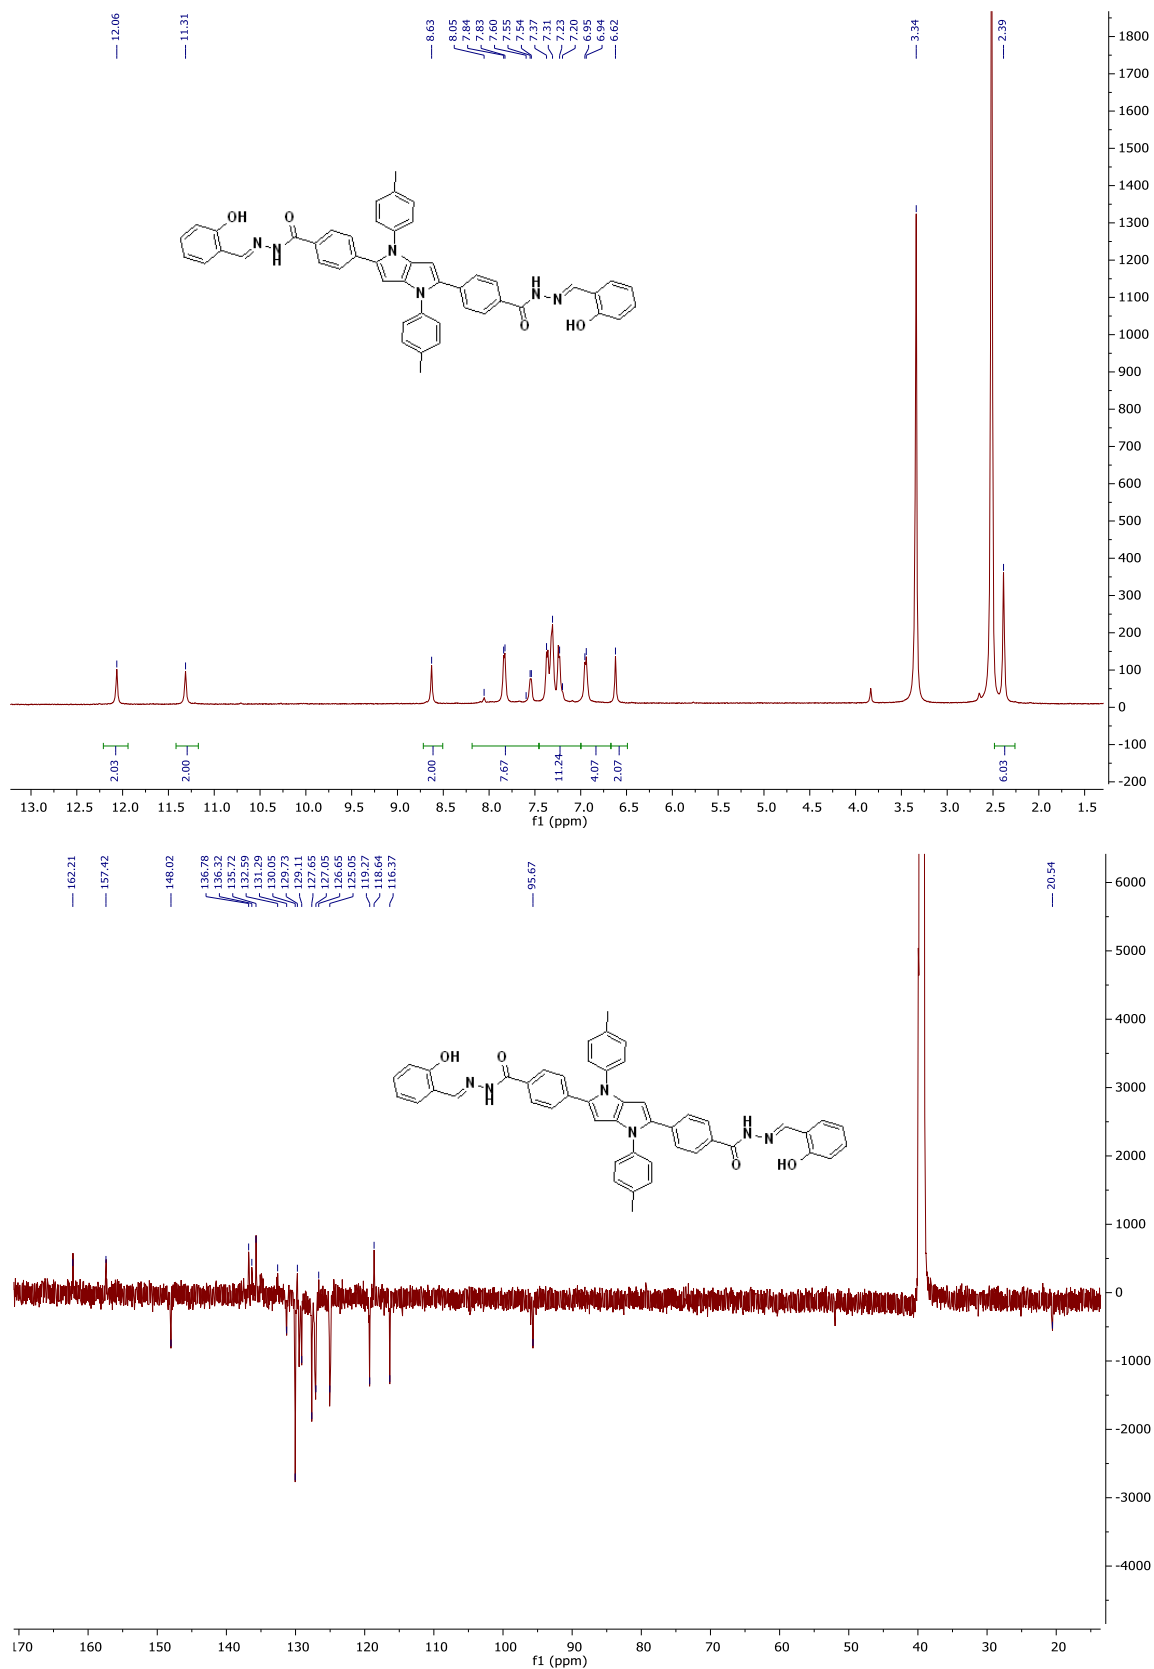

**Figure S6.** <sup>1</sup>H NMR and <sup>13</sup>C NMR spectra of Compound **6** in DMSO-d<sub>6</sub>.



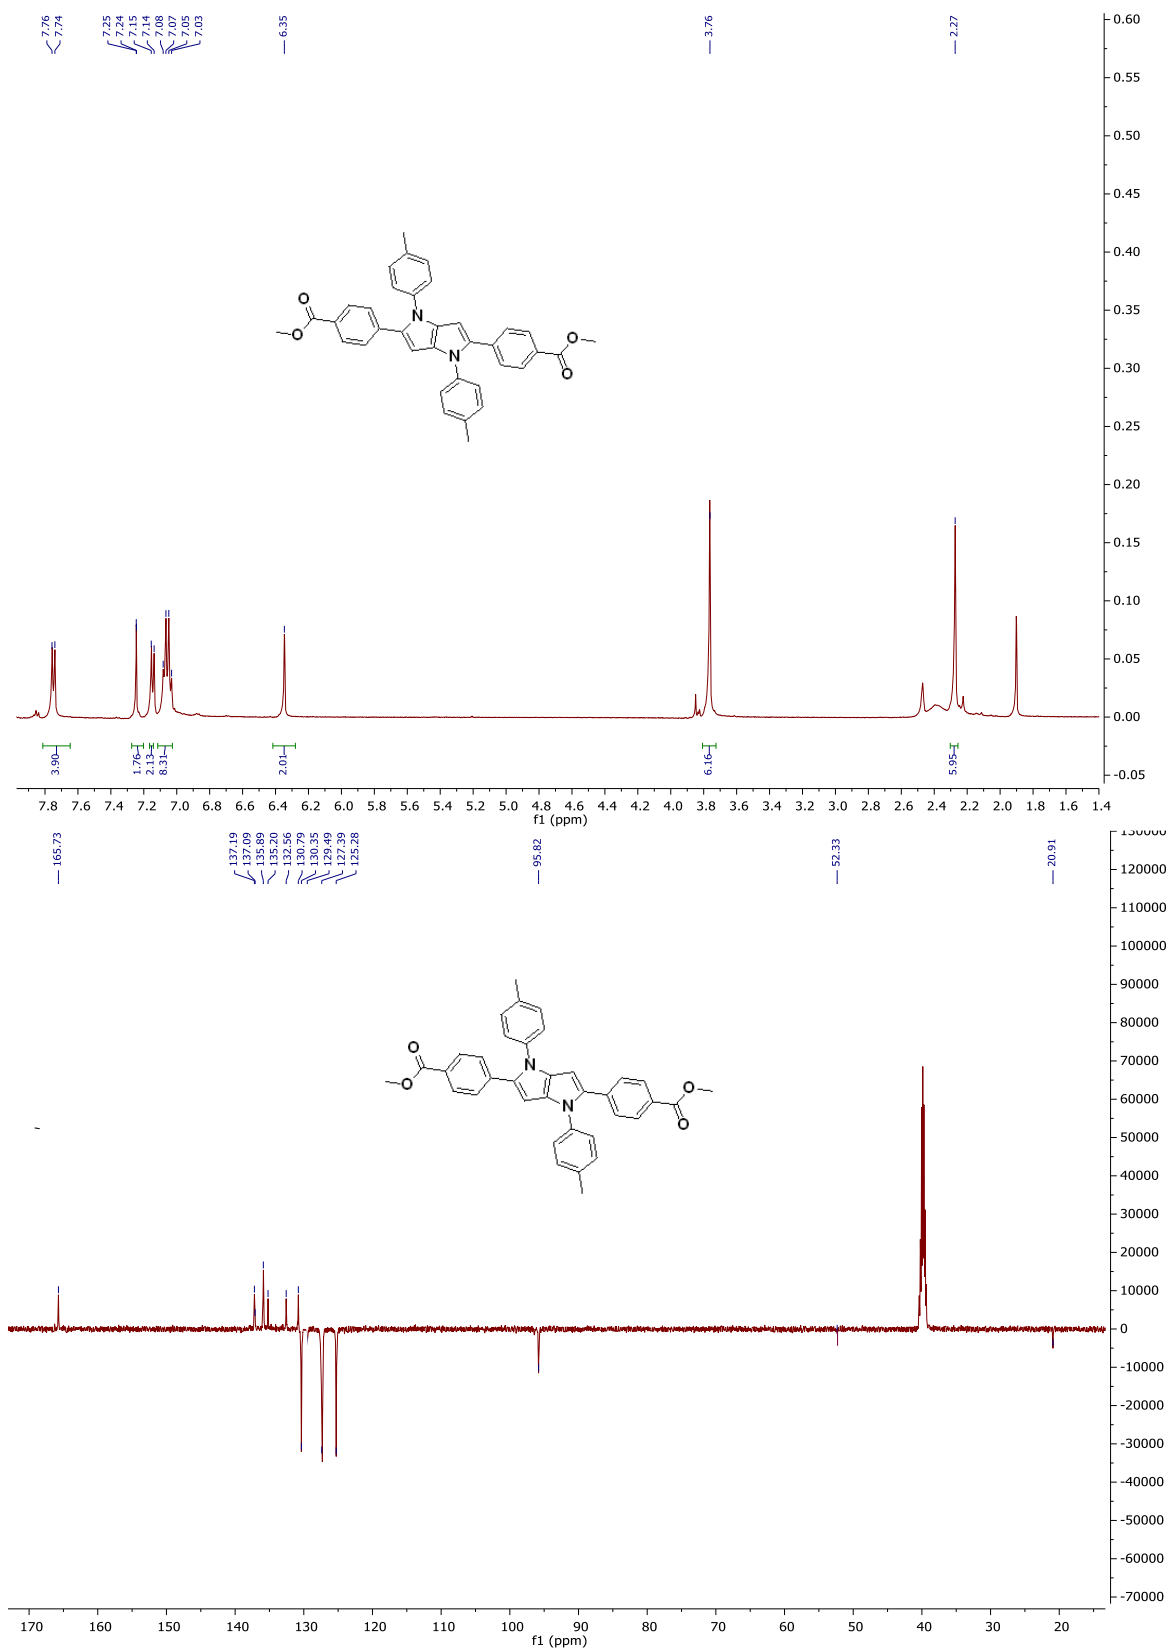

Figure S7. <sup>1</sup>H NMR and <sup>13</sup>C NMR spectra of Compound 7 in DMSO-d<sub>6</sub>.

## HRMS spectra of compound 1–7

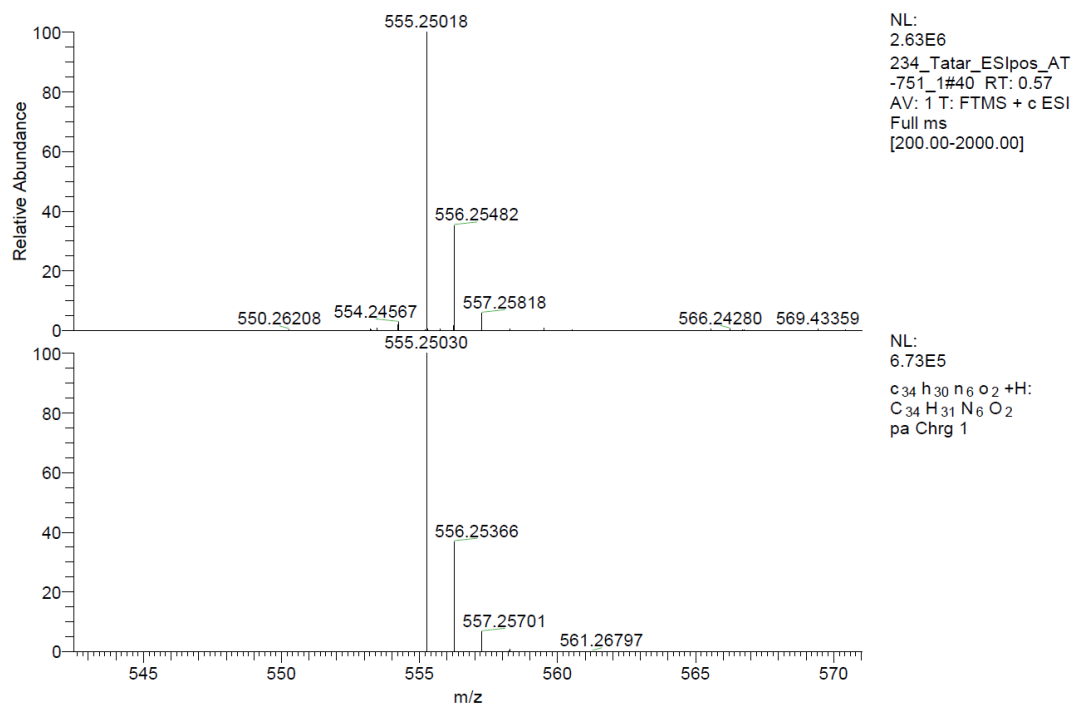

Figure S8. MS spectra of compound 1

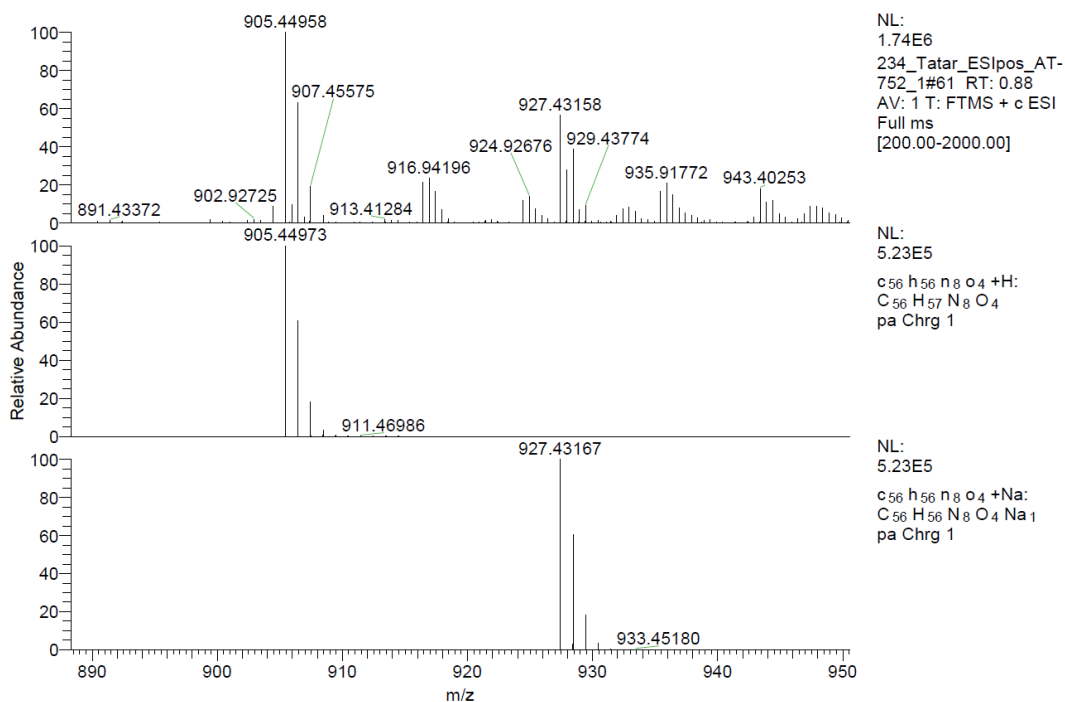

Figure S9. MS spectra of compound 2.

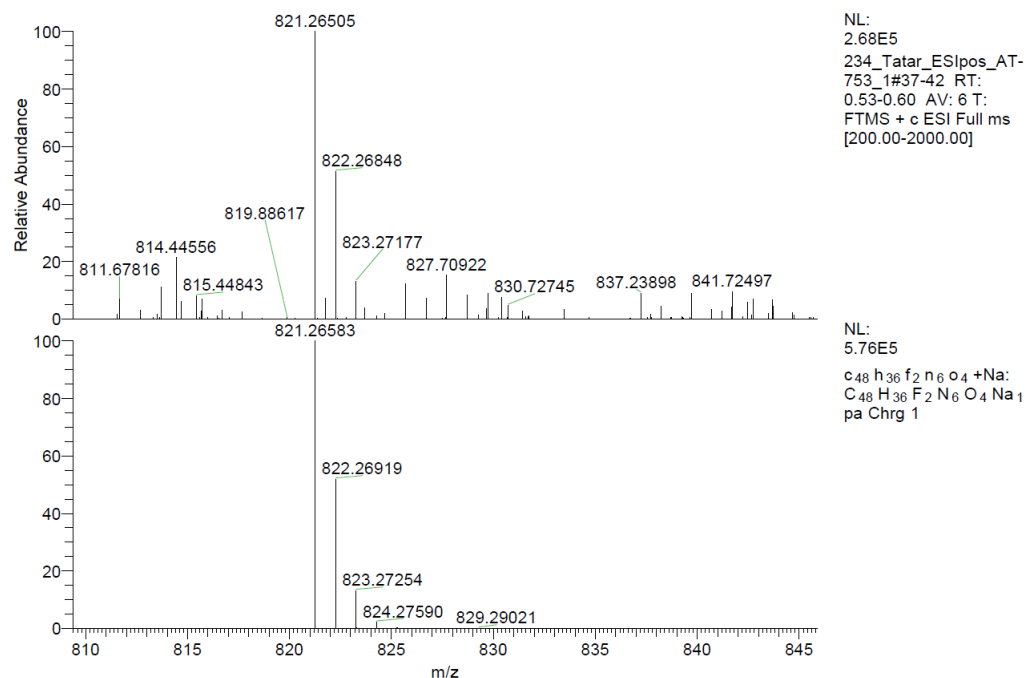

Figure S10. MS spectra of compound 3.

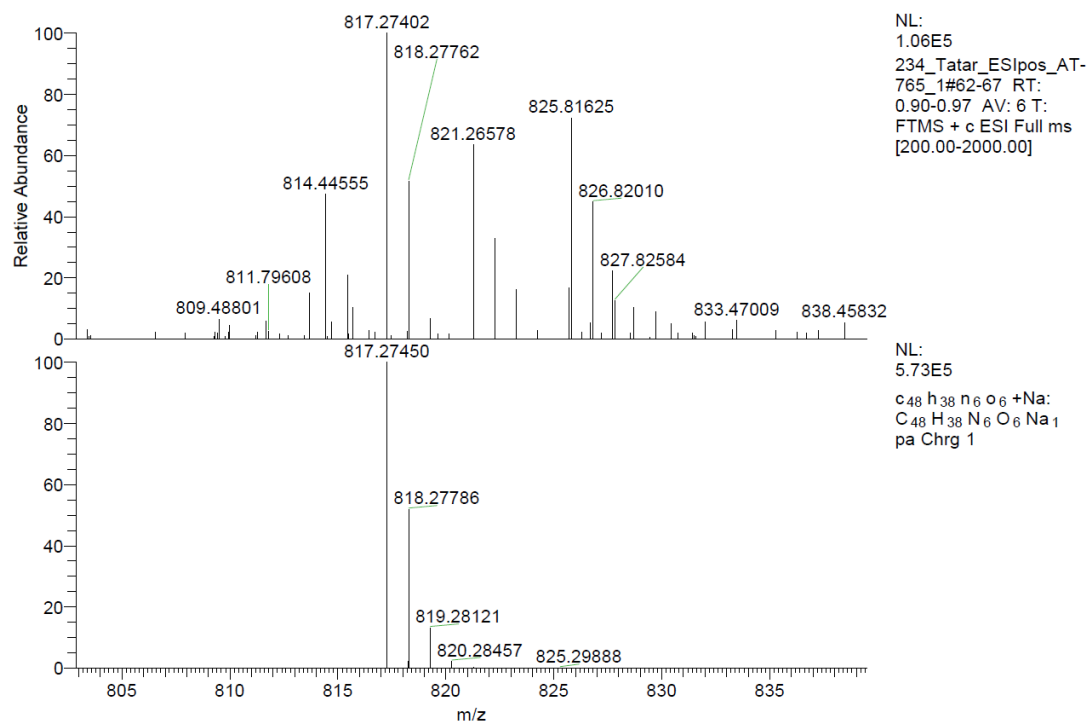

Figure S11. MS spectra of compound 4.

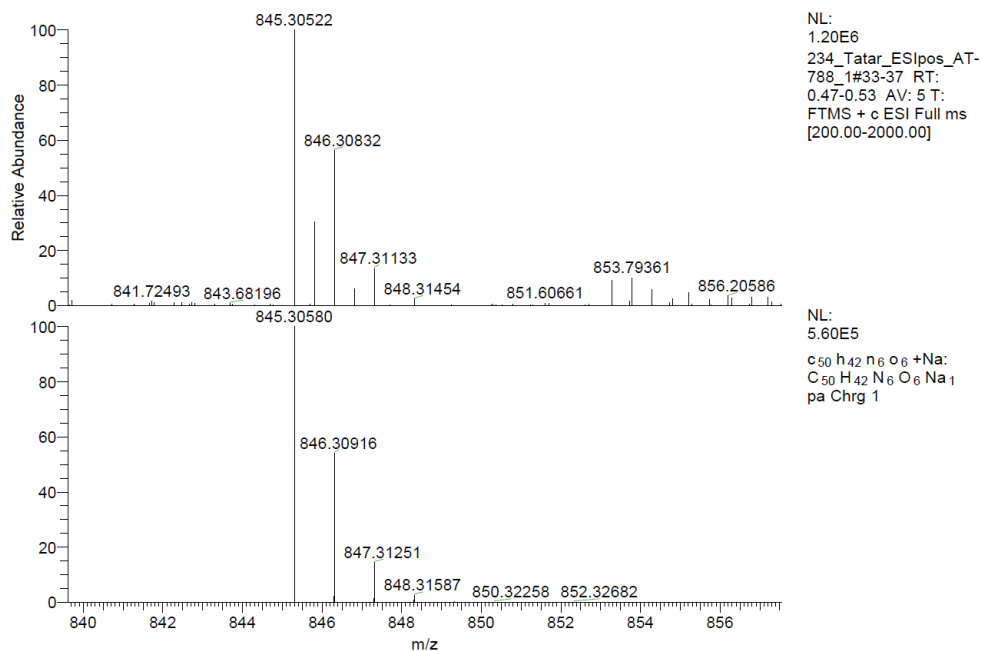

Figure S12. MS spectra of compound 5.

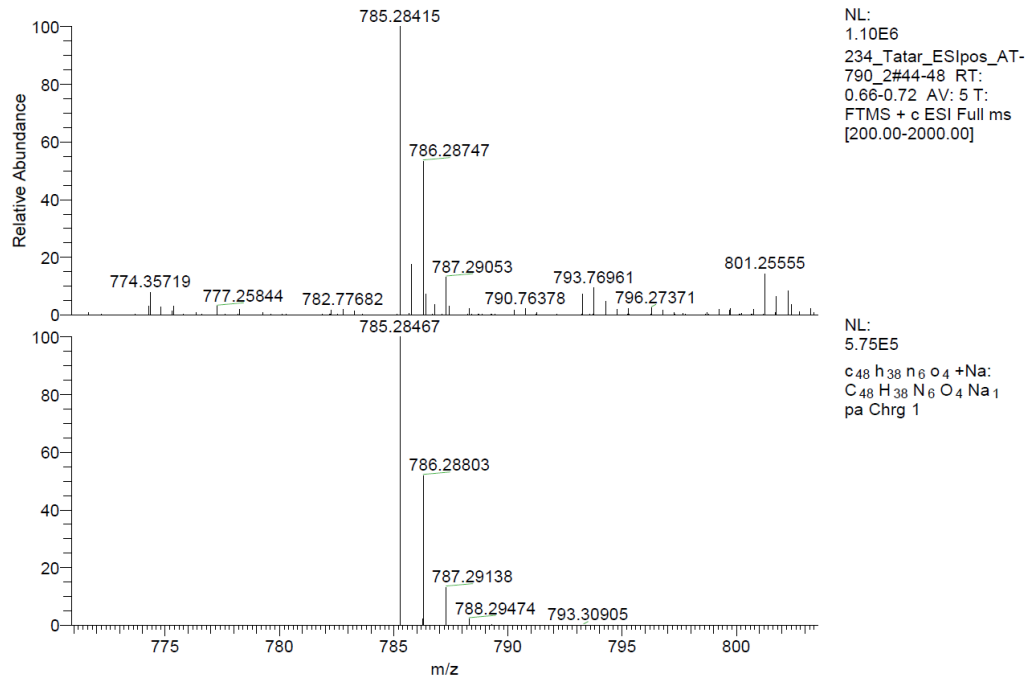

Figure S13. MS spectra of compound 6.

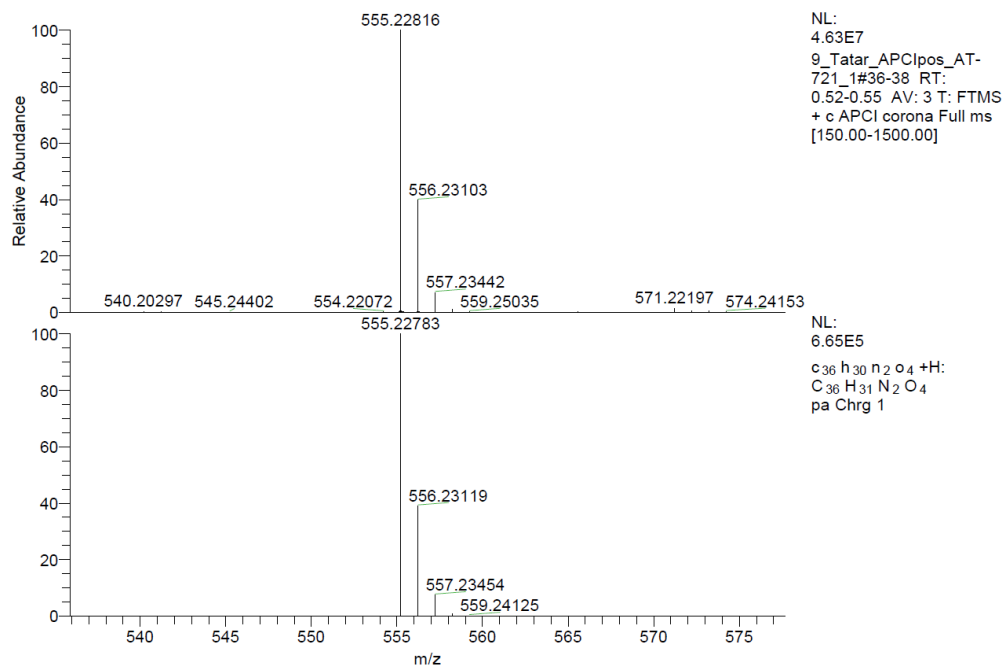

**Figure S14.** MS spectra of compound 7.

### Docking compounds 2–6 to the TET1 protein

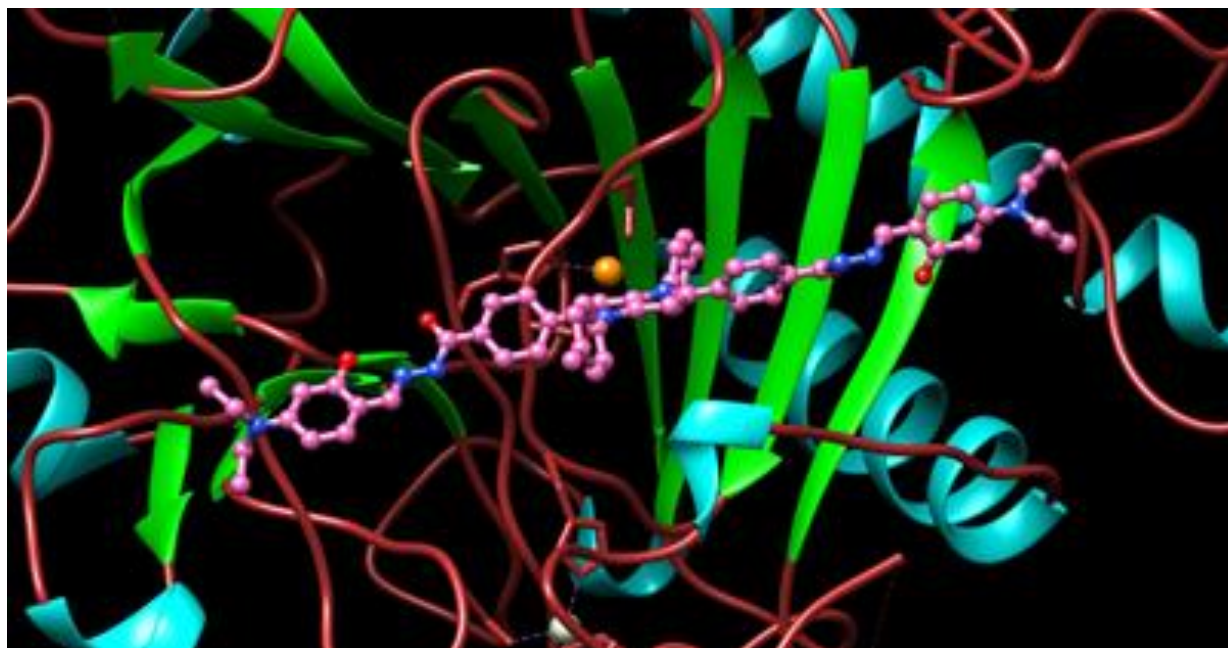

**Figure S15.** Close up view of the TET1 active site showing docked compound **2** in a sphere representation. The Fe(II) ion is displayed as a crossed orange sphere, the protein residues involved in contacts with compound **2** (pink sticks) are shown as sticks. The hydrogen bonds and carbon hydrogen bond are indicated by purple and yellow dotted lines, respectively.

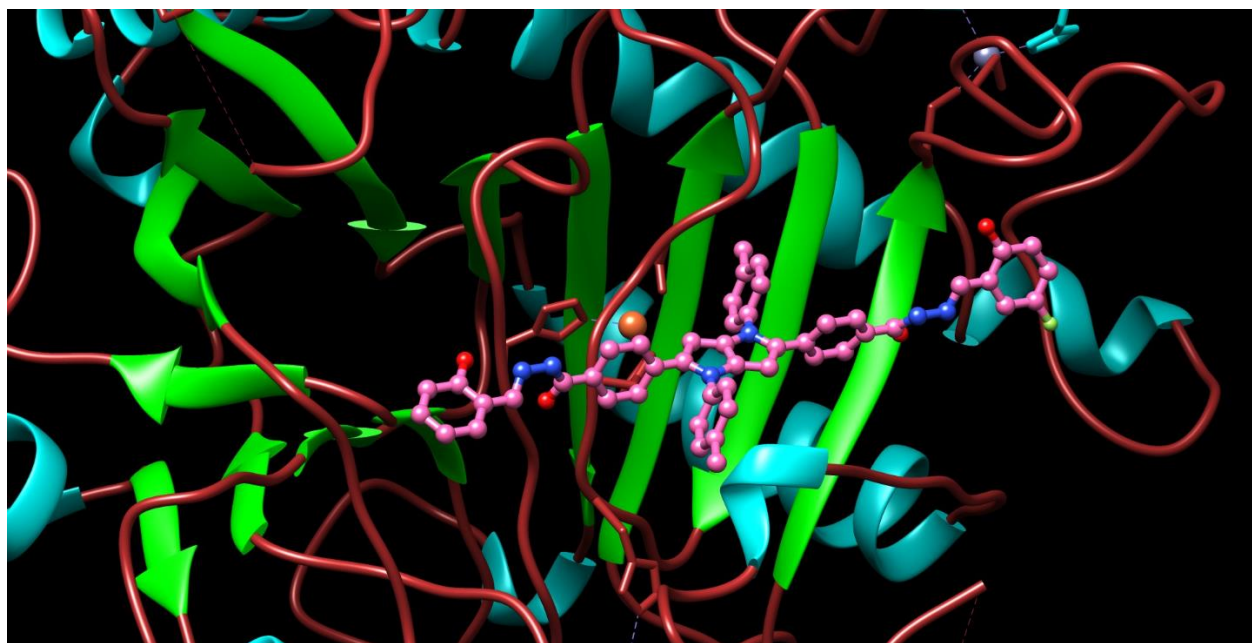

**Figure S16.** Close up view of the TET1 active site showing docked compound **3** in a sphere representation. The Fe(II) ion is displayed as a crossed orange sphere, the protein residues involved in contacts with compound **3** (pink sticks) are shown as sticks. The hydrogen bonds and carbon hydrogen bond are indicated by purple and yellow dotted lines, respectively.

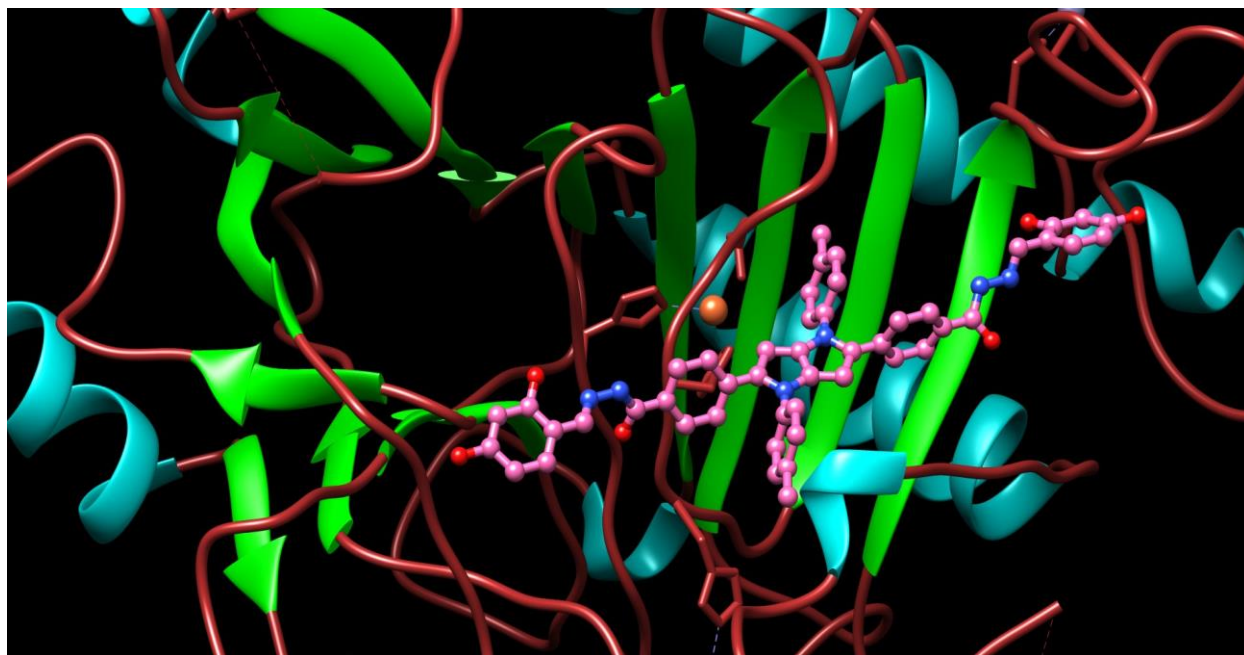

**Figure S17.** Close up view of the TET1 active site showing docked compound **4** in a sphere representation. The Fe(II) ion is displayed as a crossed orange sphere, the protein residues involved in contacts with compound **4** (pink sticks) are shown as sticks. The hydrogen bonds and carbon hydrogen bond are indicated by purple and yellow dotted lines, respectively.

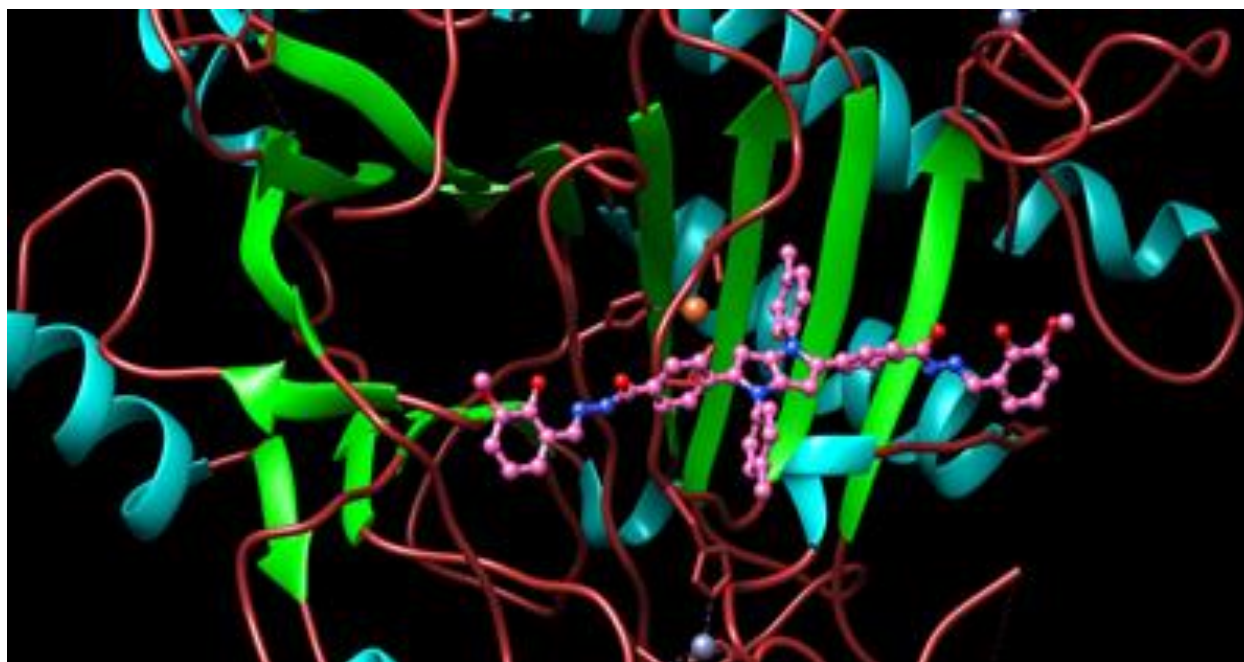

**Figure S18.** Close up view of the TET1 active site showing docked compound **5** in a sphere representation. The Fe(II) ion is displayed as a crossed orange sphere, the protein residues involved in contacts with compound **5** (pink sticks) are shown as sticks. The hydrogen bonds and carbon hydrogen bond are indicated by purple and yellow dotted lines, respectively.



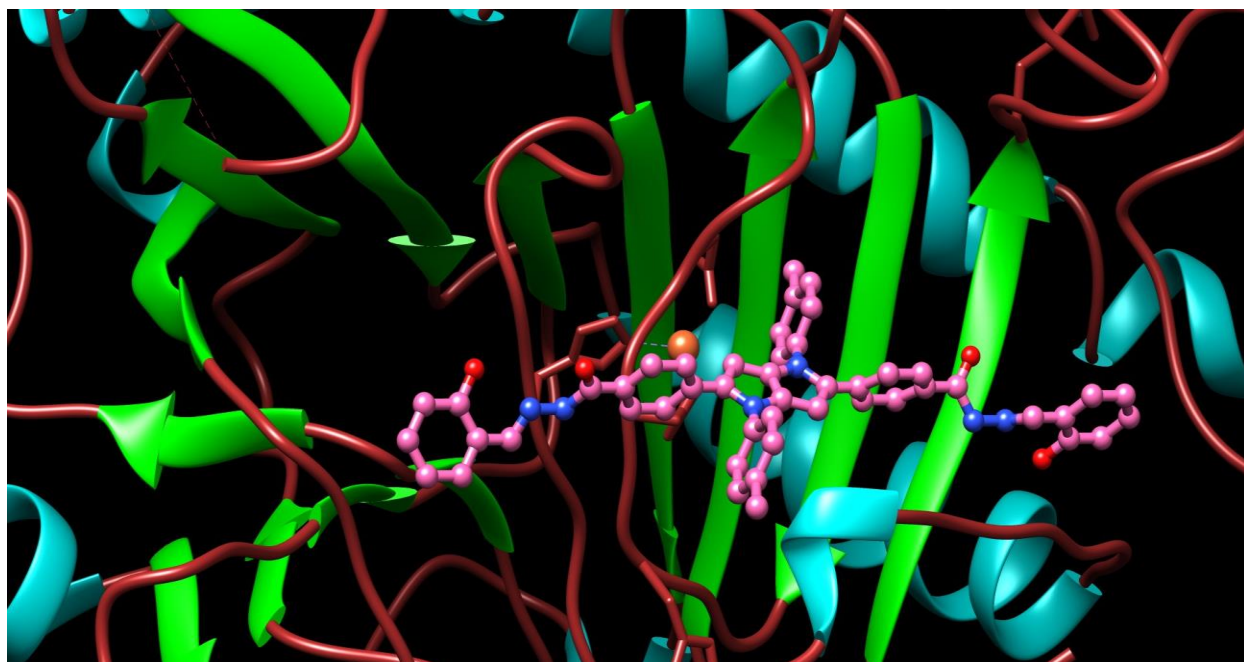

**Figure S19.** Close up view of the TET1 active site showing docked compound **6** in a sphere representation. The Fe(II) ion is displayed as a crossed orange sphere, the protein residues involved in contacts with compound **6** (pink sticks) are shown as sticks. The hydrogen bonds and carbon hydrogen bond are indicated by purple and yellow dotted lines, respectively.

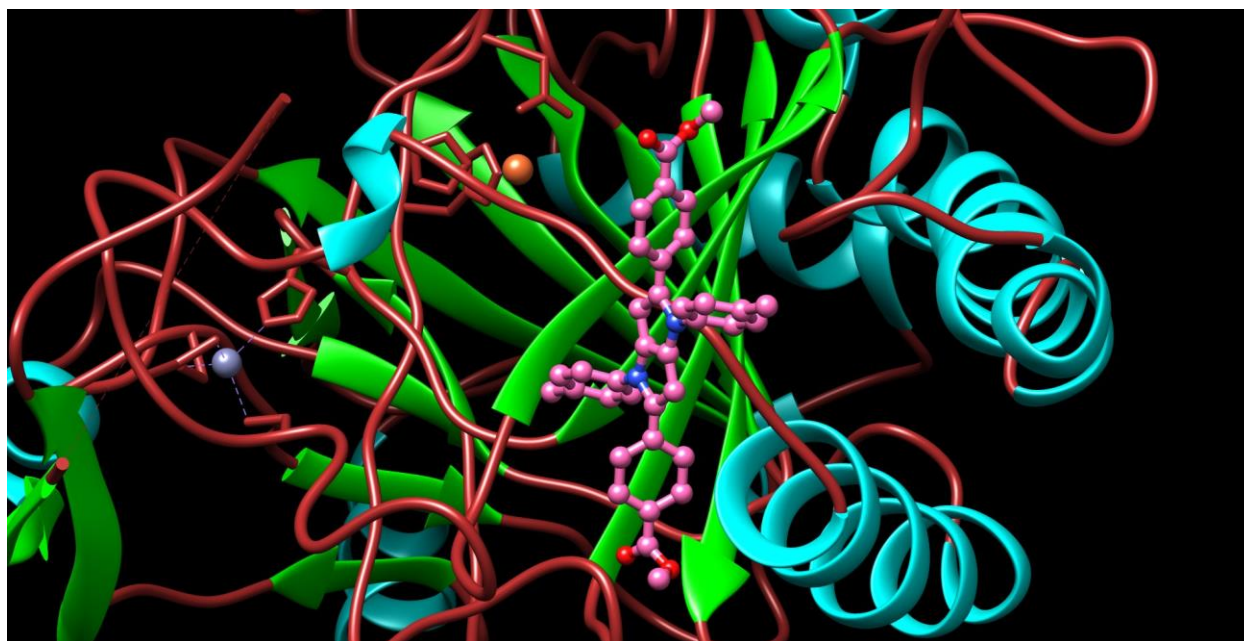

**Figure S20.** Close up view of the TET1 active site showing docked compound **7** in a sphere representation. The Fe(II) ion is displayed as a crossed orange sphere, the protein residues involved in contacts with compound **7** (pink sticks) are shown as sticks. The hydrogen bonds and carbon hydrogen bond are indicated by purple and yellow dotted lines, respectively.



## Inhibition of TET1 protein

Table S1. Residual TET1 protein activity on the concentration of compound 1.

| Log c (751/compound 1) | average residual TET activity (%) |
|------------------------|-----------------------------------|
| 4                      | 5.107745                          |
| 5                      | 19.97357                          |
| 6                      | 56.08355                          |
| 7                      | 82.58792                          |

## Toxicity (MTT assay)

### Caov-3

Table S2. Viability of Caov-3 cells in the presence of compound 1.

| Cell viability % |          |          |          |
|------------------|----------|----------|----------|
| 20 uM            | 28.51596 | 35.73407 | 39.69061 |
| 15 uM            | 35.10045 | 41.90383 | 45.92074 |
| 10 uM            | 45.06162 | 53.56232 | 43.67450 |
| 7.5 uM           | 56.44099 | 51.67812 | 65.52312 |
| 5 uM             | 50.93702 | 48.77331 | 58.08483 |
| 2.5 uM           | 55.86696 | 71.78777 | 55.75334 |
| 1 uM             | 81.16343 | 71.06968 | 89.65883 |
| 750 nM           | 78.45686 | 95.40726 | 77.66887 |
| 500 nM           | 91.35573 | 100.9421 | 76.34775 |
| 100 nM           | 97.8727  | 80.60844 | 94.80077 |
| Control          | 100      | 100      | 100      |

Table S3. Viability of Caov-3 cells in the presence of compound 2.

| Cell viability % |          |          |          |
|------------------|----------|----------|----------|
| 20 uM            | 28.42292 | 25.29919 | 23.24628 |
| 15 uM            | 42.75603 | 50.9752  | 42.32679 |
| 10 uM            | 52.13448 | 51.36046 | 52.94626 |
| 7.5 uM           | 73.28024 | 79.19576 | 67.96892 |
| 5 uM             | 59.21257 | 86.03419 | 70.4727  |
| 2.5 uM           | 64.6096  | 82.47049 | 61.81465 |
| 1 uM             | 78.50034 | 67.15627 | 48.54306 |
| 750 nM           | 73.36872 | 52.90151 | 76.28723 |
| 500 nM           | 76.19996 | 78.8105  | 77.84582 |
| 100 nM           | 95.32425 | 105.779  | 93.87006 |
| Control          | 100      | 100      | 100      |

Table S4. Viability of Caov-3 cells in the presence of compound 3.

| Cell viability % |          |          |          |
|------------------|----------|----------|----------|
| 20 $\mu$ M       | 35.49563 | 34.97841 | 37.90087 |
| 15 $\mu$ M       | 58.99942 | 57.50729 | 62.97376 |
| 10 $\mu$ M       | 65.43991 | 67.36582 | 81.12244 |
| 7.5 $\mu$ M      | 83.03623 | 61.93708 | 104.0087 |
| 5 $\mu$ M        | 70.6153  | 67.61258 | 86.51603 |
| 2.5 $\mu$ M      | 85.27889 | 89.38926 | 98.68805 |
| 1 $\mu$ M        | 89.3617  | 86.92165 | 97.81341 |
| 750 nM           | 86.6015  | 81.49291 | 112.9009 |
| 500 nM           | 93.50201 | 75.38556 | 98.76093 |
| 100 nM           | 84.41633 | 80.39359 | 71.13703 |
| Control          | 100      | 100      | 100      |

Table S5. Viability of Caov-3 cells in the presence of compound 4.

| Cell viability % |          |          |          |
|------------------|----------|----------|----------|
| 20 $\mu$ M       | 14.32384 | 14.90858 | 14.49109 |
| 15 $\mu$ M       | 19.49414 | 17.58087 | 17.59632 |
| 10 $\mu$ M       | 42.88256 | 41.06892 | 42.6107  |
| 7.5 $\mu$ M      | 53.11536 | 53.65682 | 54.16907 |
| 5 $\mu$ M        | 50.70943 | 80.94234 | 55.26165 |
| 2.5 $\mu$ M      | 74.64528 | 110.1266 | 69.69523 |
| 1 $\mu$ M        | 100.802  | 98.73418 | 92.86946 |
| 750 nM           | 92.84392 | 102.8833 | 94.07706 |
| 500 nM           | 104.1332 | 102.391  | 108.5681 |
| 100 nM           | 68.5943  | 84.94756 | 82.17366 |
| Control          | 100      | 100      | 100      |

Table S6. Viability of Caov-3 cells in the presence of compound 5.

| Cell viability % |          |          |          |
|------------------|----------|----------|----------|
| 20 $\mu$ M       | 17.9126  | 16.1941  | 14.82686 |
| 15 $\mu$ M       | 31.48711 | 34.22252 | 36.44149 |
| 10 $\mu$ M       | 29.50216 | 41.31352 | 47.32635 |
| 7.5 $\mu$ M      | 62.47383 | 49.34999 | 63.65028 |
| 5 $\mu$ M        | 83.63463 | 81.63093 | 70.92022 |
| 2.5 $\mu$ M      | 106.339  | 69.33987 | 79.185   |
| 1 $\mu$ M        | 115.5595 | 95.47527 | 128.3145 |
| 750 nM           | 97.71646 | 117.0859 | 120.9681 |
| 500 nM           | 90.56137 | 116.6807 | 137.4211 |
| 100 nM           | 124.7159 | 131.0561 | 82.39908 |
| Control          | 100      | 100      | 100      |

Table S7. Viability of Caov-3 cells in the presence of compound 6.

| Cell viability % |          |          |          |
|------------------|----------|----------|----------|
| 20 $\mu$ M       | 17.40035 | 17.33918 | 16.87916 |
| 15 $\mu$ M       | 36.28942 | 42.46159 | 49.26344 |
| 10 $\mu$ M       | 52.61726 | 73.89153 | 61.73714 |
| 7.5 $\mu$ M      | 57.99583 | 65.62553 | 91.09419 |
| 5 $\mu$ M        | 62.99023 | 65.69306 | 100.7653 |
| 2.5 $\mu$ M      | 67.85657 | 93.922   | 75.10942 |
| 1 $\mu$ M        | 64.71906 | 111.7508 | 115.9087 |
| 750 nM           | 66.96014 | 65.96319 | 78.49627 |
| 500 nM           | 89.11477 | 125.1899 | 99.08169 |
| 100 nM           | 90.2569  | 126.2705 | 118.7488 |
| Control          | 100      | 100      | 100      |

### H-1299

Table S8. Viability of H-1299 cells in the presence of compound 1.

| Cell viability % |          |          |          |
|------------------|----------|----------|----------|
| 20 $\mu$ M       | 19.24406 | 17.01043 | 14.67647 |
| 15 $\mu$ M       | 23.87986 | 23.04042 | 23.96276 |
| 10 $\mu$ M       | 35.21357 | 36.64265 | 31.8986  |
| 7.5 $\mu$ M      | 38.35093 | 36.84003 | 36.66628 |
| 5 $\mu$ M        | 57.68489 | 61.73559 | 69.22959 |
| 2.5 $\mu$ M      | 68.0251  | 76.07293 | 72.38632 |
| 1 $\mu$ M        | 69.85522 | 81.23464 | 63.29924 |
| 750 nM           | 97.30258 | 84.13106 | 122.0664 |
| 500 nM           | 114.5756 | 80.35216 | 108.7959 |
| 100 nM           | 86.71852 | 74.42021 | 77.19802 |
| Control          | 100      | 100      | 100      |

Table S9. Viability of H-1299 cells in the presence of compound 2.

| Cell viability % |          |          |          |
|------------------|----------|----------|----------|
| 20 $\mu$ M       | 28.59897 | 32.03724 | 28.81821 |
| 15 $\mu$ M       | 39.77581 | 39.64275 | 37.79295 |
| 10 $\mu$ M       | 45.51456 | 38.48482 | 47.34705 |
| 7.5 $\mu$ M      | 42.29877 | 36.16895 | 50.74895 |
| 5 $\mu$ M        | 53.16155 | 53.26162 | 57.69069 |
| 2.5 $\mu$ M      | 73.18867 | 66.9068  | 60.81677 |
| 1 $\mu$ M        | 72.40433 | 69.86743 | 82.46944 |
| 750 nM           | 74.14295 | 70.73588 | 81.48872 |
| 500 nM           | 71.47733 | 66.22258 | 72.35567 |
| 100 nM           | 77.6381  | 61.36715 | 71.29831 |
| Control          | 100      | 100      | 100      |

Table S10. Viability of H-1299 cells in the presence of compound 3.

| Cell viability % |          |          |          |
|------------------|----------|----------|----------|
| 20 $\mu$ M       | 31.42255 | 35.73111 | 34.4596  |
| 15 $\mu$ M       | 58.89207 | 44.57329 | 46.49157 |
| 10 $\mu$ M       | 47.85276 | 61.93151 | 65.75698 |
| 7.5 $\mu$ M      | 56.61426 | 68.90741 | 84.49209 |
| 5 $\mu$ M        | 85.7362  | 93.25965 | 99.67511 |
| 2.5 $\mu$ M      | 123.9575 | 110.6978 | 112.6272 |
| 1 $\mu$ M        | 70.17579 | 93.78511 | 104.6587 |
| 750 nM           | 90.73998 | 102.5498 | 126.8789 |
| 500 nM           | 146.8316 | 115.9449 | 119.3443 |
| 100 nM           | 132.2567 | 108.7232 | 102.9023 |
| Control          | 100      | 100      | 100      |

Table S11. Viability of H-1299 cells in the presence of compound 4.

| Cell viability % |          |          |          |
|------------------|----------|----------|----------|
| 20 $\mu$ M       | 7.35088  | 7.889723 | 6.314614 |
| 15 $\mu$ M       | 11.0926  | 10.45612 | 11.77551 |
| 10 $\mu$ M       | 14.81916 | 21.63938 | 18.83578 |
| 7.5 $\mu$ M      | 35.84548 | 38.28207 | 33.07157 |
| 5 $\mu$ M        | 66.67298 | 68.73663 | 52.75386 |
| 2.5 $\mu$ M      | 77.6406  | 77.91344 | 68.92042 |
| 1 $\mu$ M        | 88.01973 | 73.99385 | 66.83116 |
| 750 nM           | 86.06311 | 86.19959 | 81.88825 |
| 500 nM           | 110.8313 | 69.07882 | 86.71517 |
| 100 nM           | 109.7831 | 109.0835 | 92.98296 |
| Control          | 100      | 100      | 100      |

Table S12. Viability of H-1299 cells in the presence of compound 5.

| Cell viability % |          |          |          |
|------------------|----------|----------|----------|
| 20 $\mu$ M       | 31.42255 | 35.73111 | 28.72878 |
| 15 $\mu$ M       | 46.49157 | 44.57329 | 49.80137 |
| 10 $\mu$ M       | 47.85276 | 61.93151 | 54.82123 |
| 7.5 $\mu$ M      | 56.61426 | 68.90741 | 70.44059 |
| 5 $\mu$ M        | 85.7362  | 93.25965 | 83.0986  |
| 2.5 $\mu$ M      | 105.6814 | 110.6978 | 93.89671 |
| 1 $\mu$ M        | 59.82921 | 93.78511 | 88.11845 |
| 750 nM           | 77.36145 | 98.71354 | 102.5498 |
| 500 nM           | 125.183  | 115.9449 | 119.3443 |
| 100 nM           | 112.7571 | 101.9931 | 108.7232 |
| Control          | 100      | 100      | 100      |

Table S13. Viability of H-1299 cells in the presence of compound 6.

| Cell viability % |          |          |          |
|------------------|----------|----------|----------|
| 20 $\mu$ M       | 34.39408 | 33.42316 | 31.59845 |
| 15 $\mu$ M       | 38.6779  | 36.41601 | 29.23822 |
| 10 $\mu$ M       | 54.81208 | 52.11373 | 46.78871 |
| 7.5 $\mu$ M      | 63.73957 | 53.98429 | 50.35933 |
| 5 $\mu$ M        | 69.39882 | 77.63368 | 53.79378 |
| 2.5 $\mu$ M      | 77.44904 | 63.25052 | 56.68356 |
| 1 $\mu$ M        | 86.37654 | 69.89151 | 61.19579 |
| 750 nM           | 90.21244 | 83.61392 | 74.74846 |
| 500 nM           | 82.0418  | 69.87655 | 74.97541 |
| 100 nM           | 74.56842 | 77.16424 | 73.26575 |
| Control          | 100      | 100      | 100      |

#### BT-20

Table S14. Viability of BT-20 cells in the presence of compound 1.

| Cell viability % |          |          |          |
|------------------|----------|----------|----------|
| 20 $\mu$ M       | 19.84508 | 18.85411 | 15.23017 |
| 15 $\mu$ M       | 33.46688 | 32.99136 | 30.01959 |
| 10 $\mu$ M       | 41.4797  | 44.0939  | 37.78159 |
| 7.5 $\mu$ M      | 41.17171 | 50.1262  | 42.238   |
| 5 $\mu$ M        | 56.78419 | 56.30994 | 56.39079 |
| 2.5 $\mu$ M      | 69.15064 | 55.65371 | 54.6523  |
| 1 $\mu$ M        | 102.5641 | 98.92008 | 100.049  |
| 750 nM           | 91.1859  | 98.59611 | 95.51909 |
| 500 nM           | 87.76709 | 106.1555 | 91.84623 |
| 100 nM           | 101.7094 | 100.0252 | 99.53477 |
| Control          | 100      | 100      | 100      |

Table S15. Viability of BT-20 cells in the presence of compound 2.

| Cell viability % |          |          |          |
|------------------|----------|----------|----------|
| 20 $\mu$ M       | 28.29374 | 24.60878 | 32.37022 |
| 15 $\mu$ M       | 46.67927 | 49.89904 | 44.53966 |
| 10 $\mu$ M       | 45.0324  | 57.49622 | 51.12635 |
| 7.5 $\mu$ M      | 60.23218 | 62.61989 | 57.00293 |
| 5 $\mu$ M        | 73.8391  | 79.32862 | 68.97649 |
| 2.5 $\mu$ M      | 98.61111 | 100.513  | 96.3761  |
| 1 $\mu$ M        | 123.7041 | 111.0298 | 97.08619 |
| 750 nM           | 88.88888 | 105.3004 | 102.8159 |
| 500 nM           | 89.79482 | 89.90409 | 93.14397 |
| 100 nM           | 89.52991 | 96.38229 | 111.3369 |
| Control          | 100      | 100      | 100      |

Table S16. Viability of BT-20 cells in the presence of compound 3.

| Cell viability % |          |          |          |
|------------------|----------|----------|----------|
| 20 $\mu$ M       | 40.96308 | 33.39072 | 29.51477 |
| 15 $\mu$ M       | 48.94036 | 53.93698 | 48.1349  |
| 10 $\mu$ M       | 62.90925 | 60.85546 | 57.18601 |
| 7.5 $\mu$ M      | 73.13243 | 71.92611 | 72.15611 |
| 5 $\mu$ M        | 85.1299  | 91.78971 | 101.4304 |
| 2.5 $\mu$ M      | 99.35225 | 99.33788 | 98.89039 |
| 1 $\mu$ M        | 103.802  | 95.2857  | 94.69757 |
| 750 nM           | 99.71837 | 90.49196 | 101.3318 |
| 500 nM           | 95.26861 | 90.62438 | 106.8284 |
| 100 nM           | 83.41196 | 73.85949 | 70.55268 |
| Control          | 100      | 100      | 100      |

Table S17. Viability of BT-20 cells in the presence of compound 4.

| Cell viability % |          |          |          |
|------------------|----------|----------|----------|
| 20 $\mu$ M       | 8.369255 | 9.863568 | 12.91981 |
| 15 $\mu$ M       | 8.055758 | 8.453554 | 10.83292 |
| 10 $\mu$ M       | 20.10301 | 18.92421 | 21.27463 |
| 7.5 $\mu$ M      | 37.492   | 44.30446 | 44.18081 |
| 5 $\mu$ M        | 73.46471 | 77.51811 | 61.61889 |
| 2.5 $\mu$ M      | 82.73526 | 106.2024 | 110.5893 |
| 1 $\mu$ M        | 96.26043 | 100.5483 | 88.50558 |
| 750 nM           | 103.1798 | 88.69378 | 109.7163 |
| 500 nM           | 77.83127 | 90.8088  | 82.56707 |
| 100 nM           | 89.04617 | 76.96978 | 98.11308 |
| Control          | 100      | 100      | 100      |

Table S18. Viability of BT-20 cells in the presence of compound 5.

| Cell viability % |          |          |          |
|------------------|----------|----------|----------|
| 20 $\mu$ M       | 20.91107 | 18.3694  | 26.24032 |
| 15 $\mu$ M       | 28.47104 | 28.44734 | 34.27277 |
| 10 $\mu$ M       | 41.28907 | 52.47014 | 37.54404 |
| 7.5 $\mu$ M      | 45.69905 | 52.633   | 55.7373  |
| 5 $\mu$ M        | 60.98861 | 87.48642 | 89.10418 |
| 2.5 $\mu$ M      | 80.30046 | 100.57   | 104.0262 |
| 1 $\mu$ M        | 98.95808 | 92.10098 | 100.302  |
| 750 nM           | 86.63815 | 80.99891 | 102.8391 |
| 500 nM           | 97.43155 | 90.47231 | 107.0261 |
| 100 nM           | 85.99467 | 94.73398 | 89.5899  |
| Control          | 100      | 100      | 100      |

Table S19. Viability of BT-20 cells in the presence of compound 6.

| Cell viability % |          |          |          |
|------------------|----------|----------|----------|
| 20 $\mu$ M       | 18.802   | 24.04454 | 23.03115 |
| 15 $\mu$ M       | 37.77038 | 26.72284 | 42.10711 |
| 10 $\mu$ M       | 36.17304 | 29.6118  | 40.91705 |
| 7.5 $\mu$ M      | 50.48253 | 49.86458 | 58.52293 |
| 5 $\mu$ M        | 85.79034 | 70.29792 | 79.41897 |
| 2.5 $\mu$ M      | 89.15141 | 84.17092 | 92.78626 |
| 1 $\mu$ M        | 91.21464 | 79.29582 | 90.75954 |
| 750 nM           | 85.05824 | 84.44176 | 98.05343 |
| 500 nM           | 79.86689 | 79.34897 | 86.48855 |
| 100 nM           | 103.6273 | 95.0647  | 99.23664 |
| Control          | 100      | 100      | 100      |

### U-118 MG

Table S20. Viability of U-118 MG cells in the presence of compound 1.

| Cell viability % |          |          |          |
|------------------|----------|----------|----------|
| 20 $\mu$ M       | 32.43007 | 38.37077 | 42.77049 |
| 15 $\mu$ M       | 52.86713 | 49.75257 | 52.18157 |
| 10 $\mu$ M       | 49.80769 | 65.4465  | 62.16216 |
| 7.5 $\mu$ M      | 65.89161 | 73.35363 | 73.21463 |
| 5 $\mu$ M        | 64.50323 | 72.2848  | 61.20133 |
| 2.5 $\mu$ M      | 59.82518 | 71.64119 | 61.0448  |
| 1 $\mu$ M        | 61.64336 | 65.24553 | 66.50362 |
| 750 nM           | 75.25695 | 75.76429 | 76.03209 |
| 500 nM           | 81.23335 | 77.57442 | 78.28213 |
| 100 nM           | 74.91259 | 89.41759 | 92.95637 |
| Control          | 100      | 100      | 100      |

Table S21. Viability of U-118 MG cells in the presence of compound 2.

| Cell viability % |          |          |          |
|------------------|----------|----------|----------|
| 20 $\mu$ M       | 39.14967 | 44.6621  | 48.65798 |
| 15 $\mu$ M       | 51.07196 | 55.67384 | 56.44768 |
| 10 $\mu$ M       | 57.92607 | 65.41163 | 61.06994 |
| 7.5 $\mu$ M      | 66.32476 | 62.32276 | 65.79428 |
| 5 $\mu$ M        | 62.14151 | 65.49889 | 62.22748 |
| 2.5 $\mu$ M      | 70.66434 | 64.2773  | 70.34197 |
| 1 $\mu$ M        | 84.08913 | 82.07757 | 80.29337 |
| 750 nM           | 69.99316 | 77.01671 | 67.38152 |
| 500 nM           | 63.95961 | 68.29109 | 66.75732 |
| 100 nM           | 82.47858 | 87.05401 | 87.05401 |
| Control          | 100      | 100      | 100      |

Table S22. Viability of U-118 MG cells in the presence of compound 3.

| Cell viability % |          |          |          |
|------------------|----------|----------|----------|
| 20 $\mu$ M       | 35.11642 | 30.46595 | 32.81925 |
| 15 $\mu$ M       | 42.59714 | 46.07461 | 47.08923 |
| 10 $\mu$ M       | 45.5567  | 53.28832 | 53.00398 |
| 7.5 $\mu$ M      | 48.34217 | 52.95491 | 55.16316 |
| 5 $\mu$ M        | 57.14173 | 68.44211 | 68.47725 |
| 2.5 $\mu$ M      | 64.67516 | 61.47371 | 71.57868 |
| 1 $\mu$ M        | 75.91201 | 71.03783 | 66.44352 |
| 750 nM           | 70.23028 | 72.44006 | 70.84993 |
| 500 nM           | 87.97183 | 59.47373 | 56.29184 |
| 100 nM           | 90.89415 | 99.64991 | 109.711  |
| Control          | 100      | 100      | 100      |

Table S23. Viability of U-118 MG cells in the presence of compound 4.

| Cell viability % |          |          |          |
|------------------|----------|----------|----------|
| 20 $\mu$ M       | 15.17047 | 15.6756  | 12.30857 |
| 15 $\mu$ M       | 21.16659 | 21.17125 | 19.81549 |
| 10 $\mu$ M       | 29.97722 | 29.03249 | 31.25504 |
| 7.5 $\mu$ M      | 24.82409 | 24.18593 | 24.16683 |
| 5 $\mu$ M        | 73.68801 | 72.70924 | 76.45973 |
| 2.5 $\mu$ M      | 78.81056 | 87.60953 | 83.16356 |
| 1 $\mu$ M        | 88.82355 | 94.85053 | 87.09975 |
| 750 nM           | 88.64679 | 93.98062 | 97.44762 |
| 500 nM           | 81.50854 | 94.34568 | 91.80472 |
| 100 nM           | 89.69409 | 88.01342 | 106.1964 |
| Control          | 100      | 100      | 100      |

Table S24. Viability of U-118 MG cells in the presence of compound 5.

| Cell viability % |          |          |          |
|------------------|----------|----------|----------|
| 20 $\mu$ M       | 21.02625 | 24.2419  | 18.84402 |
| 15 $\mu$ M       | 28.8956  | 30.29581 | 23.7185  |
| 10 $\mu$ M       | 45.49669 | 44.7379  | 34.30884 |
| 7.5 $\mu$ M      | 47.16612 | 44.60394 | 36.57689 |
| 5 $\mu$ M        | 65.29145 | 61.9341  | 54.54753 |
| 2.5 $\mu$ M      | 58.217   | 62.66636 | 72.48403 |
| 1 $\mu$ M        | 87.35514 | 91.36398 | 94.34816 |
| 750 nM           | 101.0241 | 97.48939 | 72.15236 |
| 500 nM           | 91.72102 | 83.56483 | 99.83889 |
| 100 nM           | 97.80089 | 97.50102 | 97.94004 |
| Control          | 100      | 100      | 100      |



Table S25. Viability of **U-118 MG** cells in the presence of compound **6**.

| Cell viability %             |          |          |          |
|------------------------------|----------|----------|----------|
| <b>20 <math>\mu</math>M</b>  | 22.54731 | 18.63575 | 22.51363 |
| <b>15 <math>\mu</math>M</b>  | 28.04868 | 29.05686 | 32.77937 |
| <b>10 <math>\mu</math>M</b>  | 49.60407 | 51.17363 | 52.18558 |
| <b>7.5 <math>\mu</math>M</b> | 45.91981 | 45.39844 | 56.877   |
| <b>5 <math>\mu</math>M</b>   | 59.03976 | 63.22346 | 58.23376 |
| <b>2.5 <math>\mu</math>M</b> | 63.02409 | 69.74832 | 76.68138 |
| <b>1 <math>\mu</math>M</b>   | 68.44211 | 80.40844 | 81.53043 |
| <b>750 nM</b>                | 67.1918  | 73.07008 | 81.92678 |
| <b>500 nM</b>                | 73.47671 | 83.7778  | 86.54896 |
| <b>100 nM</b>                | 98.13287 | 91.37361 | 92.91959 |
| <b>Control</b>               | 100      | 100      | 100      |

#### HF-P4

Table S26. Viability of **HF-P4** cells in the presence of compound **1**.

| Cell viability %             |          |          |          |
|------------------------------|----------|----------|----------|
| <b>20 <math>\mu</math>M</b>  | 63.95658 | 64.64763 | 61.04274 |
| <b>15 <math>\mu</math>M</b>  | 67.05804 | 59.85663 | 63.15062 |
| <b>10 <math>\mu</math>M</b>  | 70.53611 | 75.93788 | 65.94317 |
| <b>7.5 <math>\mu</math>M</b> | 77.31501 | 87.02509 | 78.04878 |
| <b>5 <math>\mu</math>M</b>   | 80.70447 | 90.58038 | 81.47236 |
| <b>2.5 <math>\mu</math>M</b> | 94.32875 | 106.4486 | 88.2524  |
| <b>1 <math>\mu</math>M</b>   | 105.1617 | 114.0028 | 114.925  |
| <b>750 nM</b>                | 93.95214 | 108.0378 | 98.14276 |
| <b>500 nM</b>                | 106.2251 | 109.6499 | 91.29559 |
| <b>100 nM</b>                | 101.152  | 110.5137 | 108.5444 |
| <b>Control</b>               | 100      | 100      | 100      |

Table S27. Viability of **HF-P4** cells in the presence of compound **2**.

| Cell viability %             |          |          |          |
|------------------------------|----------|----------|----------|
| <b>20 <math>\mu</math>M</b>  | 60.27913 | 51.8655  | 56.81361 |
| <b>15 <math>\mu</math>M</b>  | 69.42844 | 82.12665 | 69.57623 |
| <b>10 <math>\mu</math>M</b>  | 83.07232 | 82.91517 | 77.13135 |
| <b>7.5 <math>\mu</math>M</b> | 84.40811 | 87.78973 | 98.14276 |
| <b>5 <math>\mu</math>M</b>   | 103.5928 | 91.30227 | 88.76707 |
| <b>2.5 <math>\mu</math>M</b> | 91.9392  | 112.4492 | 91.40747 |
| <b>1 <math>\mu</math>M</b>   | 107.1396 | 107.7419 | 92.48154 |
| <b>750 nM</b>                | 100.1551 | 106.3799 | 108.6149 |
| <b>500 nM</b>                | 120.4253 | 121.1654 | 117.1851 |
| <b>100 nM</b>                | 112.667  | 100.0956 | 124.6811 |
| <b>Control</b>               | 100      | 100      | 100      |

Table S28. Viability of **HF-P4** cells in the presence of compound **3**.

| Cell viability % |          |          |          |
|------------------|----------|----------|----------|
| <b>20 uM</b>     | 59.02883 | 62.77504 | 65.696   |
| <b>15 uM</b>     | 65.59934 | 66.39747 | 65.2     |
| <b>10 uM</b>     | 82.57799 | 74.36797 | 72.544   |
| <b>7.5 uM</b>    | 78.68825 | 83.18117 | 77.088   |
| <b>5 uM</b>      | 85.84565 | 90.27387 | 73.392   |
| <b>2.5 uM</b>    | 87.06795 | 92.78441 | 93.77668 |
| <b>1 uM</b>      | 100.1686 | 97.12644 | 98.88    |
| <b>750 nM</b>    | 106.525  | 98.1566  | 91.216   |
| <b>500 nM</b>    | 99.88198 | 100.1756 | 103.312  |
| <b>100 nM</b>    | 95.80172 | 96.12008 | 98.08001 |
| <b>Control</b>   | 100      | 100      | 100      |

Table S29. Viability of **HF-P4** cells in the presence of compound **4**.

| Cell viability % |          |          |          |
|------------------|----------|----------|----------|
| <b>20 uM</b>     | 36.4007  | 38.67986 | 44.62788 |
| <b>15 uM</b>     | 45.12022 | 53.93521 | 54.86213 |
| <b>10 uM</b>     | 59.88019 | 62.49443 | 65.68416 |
| <b>7.5 uM</b>    | 66.93568 | 70.27355 | 58.23608 |
| <b>5 uM</b>      | 74.85648 | 73.33582 | 61.31848 |
| <b>2.5 uM</b>    | 74.54031 | 86.63056 | 76.23162 |
| <b>1 uM</b>      | 85.95557 | 81.66592 | 86.70585 |
| <b>750 nM</b>    | 84.8196  | 85.09943 | 92.37617 |
| <b>500 nM</b>    | 94.85814 | 87.47438 | 94.86558 |
| <b>100 nM</b>    | 102.3796 | 100.6236 | 114.7117 |
| <b>Control</b>   | 100      | 100      | 100      |

Table S30. Viability of **HF-P4** cells in the presence of compound **5**.

| Cell viability % |          |          |          |
|------------------|----------|----------|----------|
| <b>20 uM</b>     | 52.22591 | 55.03193 | 53.23501 |
| <b>15 uM</b>     | 62.99003 | 60.11892 | 45.66372 |
| <b>10 uM</b>     | 76.65559 | 58.3808  | 56.93216 |
| <b>7.5 uM</b>    | 74.4629  | 71.79035 | 64.34612 |
| <b>5 uM</b>      | 83.96829 | 65.29699 | 72.64504 |
| <b>2.5 uM</b>    | 96.80687 | 91.7616  | 90.46214 |
| <b>1 uM</b>      | 105.1971 | 86.79821 | 100.59   |
| <b>750 nM</b>    | 84.18605 | 95.78926 | 102.0649 |
| <b>500 nM</b>    | 105.4928 | 98.20993 | 101.0423 |
| <b>100 nM</b>    | 104.2968 | 105.3072 | 105.0738 |
| <b>Control</b>   | 100      | 100      | 100      |

Table S31. Viability of **HF-P4** cells in the presence of compound **6**.

| Cell viability % |          |          |          |
|------------------|----------|----------|----------|
| <b>20 uM</b>     | 48.01772 | 42.61595 | 43.53982 |
| <b>15 uM</b>     | 62.45847 | 54.90236 | 58.15143 |
| <b>10 uM</b>     | 66.11296 | 61.41172 | 64.7001  |
| <b>7.5 uM</b>    | 62.32558 | 61.49309 | 69.34596 |
| <b>5 uM</b>      | 84.31894 | 73.0472  | 65.60473 |
| <b>2.5 uM</b>    | 94.52935 | 75.57806 | 74.70994 |
| <b>1 uM</b>      | 84.38669 | 84.11311 | 85.78171 |
| <b>750 nM</b>    | 97.81986 | 92.16844 | 90.67847 |
| <b>500 nM</b>    | 102.5471 | 95.78926 | 101.8289 |
| <b>100 nM</b>    | 114.4851 | 90.23597 | 95.39749 |
| <b>Control</b>   | 100      | 100      | 100      |
